## **CCL5 promotes breast cancer recurrence through macrophage recruitment in residual tumors**

Andrea Walens, Ashley V. DiMarco, Ryan Lupo, Benjamin R. Kroger, Jeffrey S. Damrauer, and James V. Alvarez

Department of Pharmacology and Cancer Biology, Duke University, Durham, NC 27710, USA

Keywords: breast cancer, CCL5, macrophage, collagen

The authors declare that they have no conflict of interest relevant to this work.

1 **ABSTRACT**

2 Over half of breast cancer related deaths are due to recurrence five or more years after initial  
3 diagnosis and treatment. This latency suggests that a population of residual tumor cells can survive  
4 treatment and persist in a dormant state for many years. The role of the microenvironment in  
5 regulating the survival and proliferation of residual cells following therapy remains unexplored.  
6 Using a conditional mouse model for Her2-driven breast cancer, we identify interactions between  
7 residual tumor cells and their microenvironment as critical for promoting tumor recurrence. Her2  
8 downregulation leads to an inflammatory program driven by TNF $\alpha$ /NF $\kappa$ B signaling, which  
9 promotes immune cell infiltration in regressing and residual tumors. The cytokine CCL5 is  
10 elevated following Her2 downregulation and remains high in residual tumors. CCL5 promotes  
11 tumor recurrence by recruiting CCR5-expressing macrophages, which may contribute to collagen  
12 deposition in residual tumors. Blocking this TNF $\alpha$ -CCL5-macrophage axis may be efficacious in  
13 preventing breast cancer recurrence.

14

15

## 16 INTRODUCTION

17 In 2018 it is estimated that approximately 270,000 women will be diagnosed with breast  
18 cancer, and 41,000 women will succumb to the disease (Siegel et al. 2018). Historically, over half  
19 of these deaths are due to recurrence 5 or more years after initial diagnosis and treatment (Sosa et  
20 al. 2014). This suggests that in a subset of patients, there is a population of clinically undetectable  
21 residual tumor cells that survive therapy, and may serve as a reservoir for eventual relapse. The  
22 long latency of recurrence has led to speculation that residual tumor cells are slowly growing or  
23 even dormant (Hölzel, Eckel, Emeny, & Engel, 2010; Klein, 2009). Understanding how residual  
24 cells survive therapy, persist in a non-proliferative state, and eventually resume proliferation to  
25 form recurrent tumors is critical for preventing recurrences.

26 Much of the work examining mechanisms of tumor cell survival and recurrence following  
27 therapy has focused on tumor cell-intrinsic pathways (Sosa, Avivar-Valderas, Bragado, Wen, &  
28 Aguirre-Ghiso, 2011). Genetic mutations that render cells resistant to therapy represent an  
29 important mechanism of survival (Holohan, Van Schaeybroeck, Longley, & Johnston, 2013), but  
30 there is emerging evidence that non-genetic pathways can also promote survival in response to  
31 therapy. For instance, a population of cells called drug-tolerant persisters has been shown to  
32 survive therapy through epigenetic adaptations (Sharma et al., 2010). Additionally, epithelial-to-  
33 mesenchymal transition has been shown to promote cell survival in response to EGFR inhibitors  
34 (Sequist et al., 2011). Finally, alterations in apoptotic pathways within tumor cells can promote  
35 cell survival in response to both chemotherapy and targeted therapy (Alvarez et al., 2013;  
36 Damrauer et al., 2018; Hata et al., 2016; Holohan et al., 2013; Mabe et al., 2018). In spite of this  
37 extensive literature on cell-intrinsic mechanisms of therapeutic resistance, much less is known  
38 about tumor cell-extrinsic contributions to cell survival following therapy. Specifically, while there

39 has been some recent focus on how the tumor microenvironment can promote tumor cell survival  
40 in response to therapy (Meads, Gatenby, & Dalton, 2009), little is known about whether the  
41 microenvironment regulates tumor cell survival, dormancy, and eventual recurrence.

42 We used a conditional mouse model of Her2-driven breast cancer to examine interactions  
43 between tumor cells and their microenvironment during tumor dormancy and recurrence. In this  
44 model, administration of doxycycline (dox) to bitransgenic MMTV-rtTA;TetO-Her2/neu  
45 (MTB;TAN) mice leads to mammary gland-specific expression of epidermal growth factor  
46 receptor 2 (Her2) and the development of Her2-driven tumors. Removal of dox induces Her2  
47 downregulation and tumor regression. However, a small population of residual tumor cells can  
48 survive and persist in a non-proliferative state (Alvarez et al., 2013; Moody, 2002). These cells  
49 eventually re-initiate proliferation to form recurrent tumors that are independent of Her2. Using  
50 this model, we sought to understand how the interplay between tumor cells and their  
51 microenvironment regulates residual cell survival and recurrence.

52



## 53 RESULTS

### 54 **Her2 downregulation induces an inflammatory gene expression program driven by the** 55 **TNF $\alpha$ /IKK pathway**

56 To understand how interactions between tumor cells and their environment change in  
57 response to therapy, we first examined gene expression changes following Her2 downregulation  
58 in Her2-driven tumor cells. Two independent cell lines derived from primary Her2-driven tumors  
59 (Alvarez et al., 2013; Moody, 2002) were cultured in the presence of dox to maintain Her2  
60 expression, or removed from dox for 2 days to turn off Her2 expression. Changes in Her2  
61 expression following dox withdrawal were confirmed by qPCR analysis (Figure 1 – figure  
62 supplement 1A). Changes in gene expression were measured by RNA sequencing. Her2  
63 downregulation led to widespread changes in gene expression in both cell lines (Figure 1A). Gene  
64 set enrichment analysis showed that an E2F signature was the most highly enriched gene set in  
65 cells with Her2 signaling on (+dox; Figure 1 – figure supplement 1B), consistent with previous  
66 literature and the observation that Her2 is required for the proliferation of these cells (R. J. Lee et  
67 al., 2000). Interestingly, the gene sets most significantly enriched in cells following Her2  
68 downregulation (-dox) were an inflammatory gene signature and a TNF $\alpha$ /NF $\kappa$ B gene signature  
69 (Figure 1B). These gene sets comprised genes encoding chemokines in the CCL family (CCL2,  
70 CCL5, and CCL20) and CXCL family (CXCL1, CXCL2, CXCL3, CXCL5, and CXCL10),  
71 proteins that mediate cell-cell interactions (TLR2, ICAM1, and CSF1) as well as signaling  
72 components of the NF $\kappa$ B pathway (NFKBIA and NFKBIE). All of these genes were upregulated  
73 following Her2 downregulation (Figure 1C).

74 At high concentrations (>40  $\mu$ g/ml) doxycycline itself can inhibit the NF $\kappa$ B pathway  
75 (Alexander-Savino, Hayden, Richardson, Zhao, & Poligone, 2016; Santa-Cecília et al., 2016).

76 Although the concentrations of dox (2  $\mu$ g/ml) we use to culture primary tumor cells are well below  
77 these levels, we wanted to confirmed that the NF $\kappa$ B pathway activation observed following dox  
78 withdrawal was due to loss of Her2 signaling. To do this, we treated primary tumor cells with  
79 Neratinib, a small-molecule inhibitor of Her2, to inhibit Her2 signaling without removal of dox.  
80 Neratinib treatment led to an increase in phospho-p65 (Figure 1 – figure supplement 1C), increased  
81 expression of TNF $\alpha$  (Figure 1 – figure supplement 1D), and increased expression of the NF $\kappa$ B  
82 targets CXCL5 and CCL5 (Figure 1 – figure supplement 1E and F). To further confirm that the  
83 low concentrations of dox used to culture primary tumor cells do not directly inhibit the NF $\kappa$ B  
84 pathway we treated NIH3T3 cells with TNF $\alpha$  in the presence or absence of 2  $\mu$ g/ml dox and  
85 measured NF $\kappa$ B target genes. Dox treatment had no effect on the induction of NF $\kappa$ B target genes  
86 following TNF $\alpha$  treatment (Figure 1 – figure supplement 1G). Taken together, these results  
87 demonstrate that Her2 inhibition leads to activation of the NF $\kappa$ B pathway.

88         Given the coordinated upregulation of these NF $\kappa$ B target genes, we reasoned that their  
89 expression may be induced by a common upstream secreted factor acting in an autocrine manner.  
90 To test this, we collected conditioned media from primary tumor cells grown in the absence of dox  
91 for 2 days. This conditioned media was supplemented with dox to maintain Her2 expression and  
92 added to naïve primary tumor cells. Treatment with conditioned media led to a time-dependent  
93 upregulation of the pro-inflammatory chemokine CCL5 (Figure 1D). One common upstream  
94 mediator of this cytokine response is tumor necrosis factor alpha (TNF $\alpha$ ), and we found that TNF $\alpha$   
95 expression is increased between 10-fold and 100-fold following Her2 downregulation (Figure 1E).  
96 To test whether this is sufficient to activate downstream signaling pathways, we examined  
97 activation of the NF $\kappa$ B pathway following treatment with conditioned media from cells following  
98 Her2 downregulation. Indeed, we found that treatment of naïve cells with Her2-off (–dox)

99 conditioned media led to rapid, robust, and prolonged activation of the NF $\kappa$ B pathway as assessed  
100 by phosphorylation of p65 (Figure 1F). Importantly, Her2 levels remained high in these target cells  
101 (Figure 1 – figure supplement 1H), indicating that Her2-off (–dox) conditioned media can activate  
102 the NF $\kappa$ B pathway even in the presence of Her2 signaling. In contrast, conditioned media from  
103 Her2-on (+dox) cells had no effect on p65 phosphorylation (Figure 1 – figure supplement 1I).  
104 Finally, we tested whether the induction of chemokine genes following Her2 downregulation was  
105 dependent upon the NF $\kappa$ B pathway by treating cells with the IKK inhibitor, IKK16. We found that  
106 blocking IKK activity blunted the induction of all chemokine genes following dox withdrawal  
107 (Figure 1G). Taken together, these results suggest that Her2 downregulation leads to the induction  
108 of a pro-inflammatory gene expression program, likely driven by autocrine-acting TNF $\alpha$  and  
109 mediated through the IKK-NF $\kappa$ B pathway.

#### 110 **Immune cell infiltration during tumor regression and residual disease**

111 Her2 downregulation in Her2-driven tumors *in vivo* induces apoptosis and growth arrest,  
112 ultimately leading to tumor regression (Moody, 2002). However, a small population of tumor cells  
113 can survive Her2 downregulation and persist for up to 6 months before resuming growth to form  
114 recurrent tumors. These residual tumors can be identified histologically (Figure 2A). Many of the  
115 cytokines and chemokines induced shortly after Her2 downregulation function as chemoattractants  
116 for various immune cells (Binnewies et al., 2018; López, Seoane, & Sanjuán, 2017). This led us  
117 to speculate that Her2 downregulation *in vivo* may promote infiltration of immune cells into the  
118 tumor. We therefore asked whether the immune cell composition of tumors changed during tumor  
119 regression and in residual tumors. CD45 staining showed that leukocyte infiltration increased  
120 dramatically following Her2 downregulation as compared to primary tumors (Figure 2B-C, Figure  
121 2 – figure supplement 1A). Surprisingly, leukocytes remained high in residual tumors (Figure 2D,

122 Figure 2 – figure supplement 1A). Masson’s trichrome staining revealed prominent collagen  
123 deposition in residual tumors (Figure 2D), consistent with a desmoplastic response in residual  
124 tumors. Staining for the macrophage marker F4/80 showed a dramatic increase in macrophage  
125 abundance during tumor regression (Figure 2C, Figure 2 – figure supplement 1A), and macrophage  
126 levels remained elevated in residual tumors (Figure 2D, Figure 2 – figure supplement 1A). CD3  
127 staining showed increased T cell infiltration in regressing and residual tumors (Figure 2 – figure  
128 supplement 1A,B). Taken together, these results indicate that Her2 downregulation leads to the  
129 infiltration of CD45+ leukocytes, and specifically F4/80+ macrophages. Residual tumors contain  
130 high numbers of macrophages and abundant collagen deposition, consistent with a desmoplastic  
131 response.

### 132 **Cytokine profiling of residual tumors**

133 Immune cells can influence tumor cell survival and function (Flores-Borja et al., 2016;  
134 Pollard, 2004). The large number of immune cells present in residual tumors suggests that these  
135 cells may function to regulate the behavior of residual tumor cells. To begin to address this, we  
136 sought to identify secreted factors that are expressed in residual tumors. Residual tumor cells in  
137 the autochthonous MTB;TAN model are unlabeled and are diffusely scattered throughout the  
138 mammary gland, precluding their isolation. Therefore, we used an orthotopic model in which  
139 residual tumors can be easily isolated. In this model, primary Her2-driven tumors are digested,  
140 cultured, and infected with GFP. Cells are then injected into the mammary fat pad of recipient  
141 mice on dox to generate an orthotopic primary tumor. Following dox withdrawal, the fluorescently  
142 labeled residual tumors can be easily microdissected (Figure 2 – figure supplement 1C). We first  
143 confirmed that the orthotopic model exhibited similar patterns of immune cell infiltration as the  
144 autochthonous model. Indeed, we found that macrophage staining increased dramatically during

145 tumor regression and in residual tumors (Figure 2 – figure supplement 1D-F), suggesting the  
146 orthotopic model is appropriate for identifying secreted proteins present in these residual tumors.

147 We generated a cohort of orthotopic primary tumors (n=4) and residual tumors at 28 days  
148 (n=6) and 56 days (n=6) following dox withdrawal. Residual tumors were microdissected using a  
149 fluorescent dissecting microscope. We then made protein lysates from all samples and measured  
150 the expression of cytokines and chemokines using antibody-based protein arrays. Four primary  
151 tumors and four 28-day residual tumors were profiled using a commercially available cytokine  
152 array, which measures the expression of 20 secreted factors. We then used a second commercially  
153 available cytokine array, which measures 40 cytokines and chemokines, to measure cytokine  
154 expression in the whole cohort of tumors. This analysis identified 8 cytokines that were  
155 upregulated in residual tumors as compared to primary tumors (Figure 3A; fold change >2, p<0.1,  
156 Figure 3 – source data), including CCL5, osteoprotegerin (OPG), and Vascular cell adhesion  
157 protein 1 (VCAM-1) (Figure 3B). Interestingly, VCAM-1 has been shown to regulate breast cancer  
158 dormancy (X. Lu et al., 2011), while OPG can regulate the survival of breast cancer cells (Neville-  
159 Webbe et al., 2004).

160 We next asked whether any cytokines were both induced acutely following Her2  
161 downregulation and remained elevated in residual tumors. We found that only two cytokines,  
162 CCL5 and OPG, fulfilled these criteria. Given that OPG has previously been associated with  
163 dormancy, we focused our attention on CCL5. We then wanted to determine if CCL5 expression  
164 was elevated in human residual breast tumors following treatment. We analyzed a gene expression  
165 dataset of residual breast tumors that remain following neoadjuvant targeted therapy. A number of  
166 secreted factors were upregulated in residual tumors as compared to primary tumors, and CCL5  
167 was one of the most significantly upregulated cytokines in this group (Figure 3C-D and Figure 3

168 – figure supplement 1A-M). To confirm these results, we examined an independent gene  
169 expression data set from breast cancer patients treated with neoadjuvant chemotherapy. We found  
170 that CCL5 expression was also increased in residual tumors in this dataset (Figure 3 – figure  
171 supplement 1N). These results suggest that CCL5 upregulation is a common feature of residual  
172 tumors cells that survive both conventional and targeted therapy in mice and humans, suggesting  
173 it may be functionally important in mediating the survival of these cells.

#### 174 **CCL5 expression promotes recurrence following Her2 downregulation**

175 We next wanted to directly assess whether CCL5 plays a functional role in regulating  
176 residual cell survival or recurrence. We first used an ELISA to measure CCL5 levels in orthotopic  
177 primary tumors, residual tumors, and recurrent tumors. CCL5 expression was elevated in residual  
178 tumors, confirming results from the cytokine array, and increased further in recurrent tumors  
179 (Figure 4A). We next engineered primary tumor cells to overexpress CCL5 or GFP as a control  
180 (Figure 4B) and used these cells in an orthotopic recurrence assay to test the effect of CCL5  
181 expression on tumor recurrence. Control or CCL5-expressing cells were injected orthotopically  
182 into recipient mice on doxycycline to maintain Her2 expression. Primary tumors formed with  
183 similar kinetics following injection of control and CCL5-expressing cells, indicating that CCL5  
184 expression had no effect on the growth of primary tumors (data not shown). Following primary  
185 tumor formation, mice were removed from dox to induce Her2 downregulation and tumor  
186 regression. Mice with residual tumors were palpated biweekly to monitor the formation of  
187 recurrent tumors. Tumors expressing CCL5 recurred significantly earlier than control tumors,  
188 indicating that CCL5 expression is sufficient to accelerate tumor recurrence (Figure 4C;  $p=0.023$ ;  
189  $HR=2.14$ ).

190 We next asked if tumor-derived CCL5 is necessary for recurrence. To this end, we used  
191 CRISPR-Cas9 to knock out CCL5 in primary tumor cells (Figure 4D), and tested the effect of  
192 CCL5 knockout on recurrence using the orthotopic recurrence assay described above. The growth  
193 of CCL5 knockout tumors was not different from control tumors expressing a non-targeting  
194 sgRNA (data not shown). Mice were removed from dox, and the latency of recurrence between  
195 control and CCL5 knockout tumors was compared. We found that CCL5 knockout had no effect  
196 on the latency of recurrence (Figure 4E). Taken together, these results suggest that CCL5  
197 expression is sufficient to accelerate recurrence, but tumor-derived CCL5 is not necessary for  
198 recurrence following Her2 downregulation.

199

#### 200 **CCL5 promotes macrophage infiltration in residual tumors**

201 CCL5 is a chemoattractant for various cell types, including T cells, B cells, eosinophils,  
202 basophils, neutrophils, macrophages, and fibroblasts (Dembic, 2015; Lacy, 2017; Lee et al., 2017).  
203 We observe an increase in CCL5 levels during tumor regression and in residual tumors that is  
204 concomitant with immune cell infiltration. We therefore reasoned that the effect of CCL5  
205 overexpression on recurrence may be mediated through its ability to recruit one or more of these  
206 cell types to residual lesions and recurrent tumors. CCL5 can signal through multiple receptors,  
207 including CCR1, CCR3, and CCR5, but it predominately acts through CCR5 (Soria & Ben-Baruch,  
208 2008). We therefore examined CCR5 expression on various immune and stromal cells in primary  
209 tumors (+dox), regressing tumors (5 days -dox), residual tumors (69 days -dox), and recurrent  
210 tumors by flow cytometry. As expected, Her2 was downregulated following dox withdrawal in all  
211 tumors (Figure 5 – figure supplement 1A). For each cell type, we measured the median  
212 fluorescence intensity (MFI) of CCR5 staining in CCR5+ cells. Interestingly, the level of CCR5

213 expressed on macrophages increased in residual tumors (Figure 5A and Figure 5 – figure  
214 supplement 2). In contrast, CCR5 expression on CD4<sup>+</sup> T cells CD8<sup>+</sup> T cells increased in regressing  
215 tumors, but returned to baseline in residual tumors (Figure 5B and C, Figure 5 – figure supplement  
216 2). Similar to macrophages, the expression of CCR5 on fibroblasts was elevated in residual tumors  
217 (Figure 5D, Figure 5 – figure supplement 2). We were also interested in examining CCR5  
218 expression on CD45<sup>-</sup> tumor cells. We observed a slight increase in CCR5 expression in residual  
219 tumor cells, but otherwise there was no change in CCR5 expression on these cells (Figure 5E). To  
220 directly compare the expression of CCR5 in macrophages and tumor cells, we sorted these two  
221 populations from primary, regressing, residual, and recurrent tumors from MTB;TAN mice and  
222 performed qPCR analysis. CCR5 was expressed at higher levels on macrophages than tumor cells  
223 at each stage, and its expression was especially high on residual tumor macrophages (Figure 5 –  
224 figure supplement 1B). Overall, these results identify several cell types – notably macrophages  
225 and fibroblasts – that express high levels of CCR5 and so are poised to respond to CCL5 in residual  
226 tumors.

227 To determine whether these cell types are recruited by CCL5 in residual tumors, we  
228 generated primary and residual tumors overexpressing CCL5 and analyzed the abundance of  
229 macrophages and fibroblasts by flow cytometry. Fibroblast levels were not significantly different  
230 between control and CCL5-expressing tumors (Figure 5F, Figure 5 – figure supplement 1C). In  
231 contrast, CCL5-expressing tumors exhibited a modest but consistent increase in macrophage  
232 infiltration (Figure 5G, Figure 5 – figure supplement 1D). Taken together, these results suggest  
233 that CCL5 expression in residual tumors can recruit CCR5-positive macrophages, and suggest that  
234 CCL5 may subsequently signal through CCR5 on these cells to modulate macrophage function.

235 **Macrophages express and secrete collagen and collagen deposition factors**



236 We next considered the possibility that CCL5 recruitment of macrophages to residual  
237 tumors may promote recurrence through macrophage-tumor cell crosstalk. To address this, we  
238 sorted CD45+/CD11b+/F4/80+ macrophages from primary, residual and recurrent tumors from  
239 the autochthonous MTB;TAN model by fluorescence activated cell sorting (FACS), and then  
240 isolated RNA from the sorted cell populations for RNAseq. Residual tumor-associated  
241 macrophages did not yield sufficient RNA for RNAseq, but we were able to sequence RNA from  
242 primary, regressing, and recurrent tumor-associated macrophages (TAMs). Examination of  
243 differentially expressed genes between primary and recurrent TAMs suggested that FACS-sorted  
244 TAMs may have been partially contaminated with tumor cells. For instance, we detected Her2  
245 expression at high levels in primary TAMs and low levels in recurrent TAMs. Therefore, we used  
246 a gene expression dataset of primary and recurrent tumor cells cultured in vitro to filter the TAM  
247 expression list (Figure 6 – source data 1). After filtering, we were left with approximately 200  
248 genes that were differentially expressed between primary and recurrent tumor macrophages  
249 (Figure 6A, Figure 6 – source data 2). Interestingly, genes encoding fibrillar collagen and collagen  
250 deposition proteins were more highly expressed in the recurrent TAMs than the primary TAMs or  
251 regressing tumor TAMs (Figure 6B). These genes include Collagen alpha-1(V) chain (COL5A1),  
252 Collagen type XXIV alpha 1 (COL24A1), Procollagen C-endopeptidase enhancer 1 (PCOLCE),  
253 and Asporin (ASPN). COL5A1 and COL24A1 encode fibrillar collagens, PCOLCE encodes a  
254 glycoprotein that binds and drives the cleavage of type 1 fibrillar procollagen, and ASPN encodes  
255 a protein that binds to fibrillar collagens to regulate mineralization. We next sought to validate  
256 these findings by performing qPCR analysis on primary, regressing, residual, and recurrent TAMs.  
257 This analysis showed that the expression of these genes progressively increased during tumor  
258 regression, residual disease, and recurrence (Figure 6C). Additionally, qPCR on RNA isolated

259 from bulk tumors showed higher expression of COL5A1 and COL24A1 in recurrent tumors, while  
260 a subset of recurrent tumors had high expression of ASPN and PCOLCE (Figure 6D). Consistent  
261 with this, Masson's trichrome staining showed increased collagen deposition in residual and  
262 recurrent tumors (Figure 6E, middle and bottom). In order to see if similar gene expression patterns  
263 are observed in residual disease in breast cancer patients, we examined gene expression data from  
264 residual tumors after neoadjuvant targeted therapy. Indeed, expression of these four collagen genes  
265 increased in residual tumors following therapy (Figure 6 – figure supplement 1A). Finally, we  
266 asked whether CCL5 regulates collagen deposition by comparing collagen levels in control and  
267 CCL5-expressing recurrent tumors. While control recurrent tumors had uniform levels of collagen  
268 deposition (Figure 6F and Figure 6 – figure supplement 1B-C), a subset of CCL5-expressing  
269 tumors had very high levels of collagen deposition (Figure 6F and Figure 6 – figure supplement  
270 1B-C). Taken together, these results suggest that CCL5 promotes macrophage infiltration and  
271 collagen deposition. Given the importance of collagen for regulating tumor cell function, this may  
272 be one mechanism by which CCL5 expression accelerates recurrence. This is reminiscent of  
273 findings in colorectal cancer, where collagen deposition can be mediated in part through CCR2+  
274 macrophages, and depletion of these macrophages inhibits tumor growth (Afik et al., 2016).

275

## 276 **DISCUSSION**

277 The long-term survival of residual tumor cells following therapy is a major obstacle to  
278 obtaining cures in breast cancer. Understanding the pathways that promote residual cell survival –  
279 and that induce the reactivation of these cells to generate recurrent tumors – is critical for designing  
280 therapies to prevent breast cancer relapse. There has been extensive focus on tumor cell-intrinsic  
281 pathways that allow cells to survive therapy (Holohan et al., 2013). However, the role of tumor

282 cell-extrinsic factors, including the tumor microenvironment, in regulating the survival and  
283 recurrence of residual cells has not been extensively explored.

284 Here we used a conditional mouse model to investigate how interactions between tumor  
285 cells and the tumor microenvironment change during tumor regression, residual disease, and  
286 recurrence, and in turn how the microenvironment regulates tumor recurrence. We found that Her2  
287 downregulation led to induction of a pro-inflammatory gene expression program comprising a  
288 number of chemokines and cytokines, including CCL5. This program was mediated by autocrine  
289 TNF $\alpha$  and dependent upon IKK/NF $\kappa$ B signaling. Notably, a recent study identified a similar gene  
290 expression program in EGFR-mutant lung cancer following treatment with EGFR inhibitors (Gong  
291 et al., 2018). Consistent with this pro-inflammatory gene expression program, we observed  
292 differences in immune and stromal cell infiltration during tumor regression. Both adaptive (CD4+  
293 and CD8+ T cells) and innate (macrophages) immune cells were recruited to regressing tumors.  
294 The residual tumor microenvironment is markedly different from that of primary tumors, with high  
295 numbers of macrophages and fibroblasts, abundant collagen deposition, and differential expression  
296 of a suite of cytokines, including CCL5. Functionally, CCL5 overexpression promotes  
297 macrophage recruitment, collagen deposition, and promotes tumor recurrence. These results  
298 identify CCL5 as a critical regulator of crosstalk between residual tumor cells and the residual  
299 tumor microenvironment that promotes tumor recurrence.

300 A number of studies have found that Her2 signaling directly activates the NF $\kappa$ B pathway,  
301 and that this is functionally important for tumor growth (Liu et al., 2009). Consistent with this, we  
302 observed basal levels of p65 phosphorylation in primary tumor cells. Surprisingly, we found that  
303 Her2 inhibition further activates the NF $\kappa$ B pathway, and that this occurs through an autocrine  
304 pathway that is likely mediated by increased TNF $\alpha$  expression. Hyperactivation of the NF $\kappa$ B

305 pathway in turn leads to the production of a number of cytokines and chemokines which may  
306 contribute to the recruitment of immune cells. These findings are consistent with prior work  
307 showing that the NF $\kappa$ B pathway is required for macrophage recruitment in a similar Her2-driven  
308 mouse model (Liu et al., 2010). Our findings add to these previous studies by showing that Her2  
309 inhibition leads to hyperactivation of the NF $\kappa$ B pathway and increased macrophage recruitment.

310 CCL5 has been shown to play an important role in many facets of tumor progression, such  
311 as invasion, metastasis, neoangiogenesis, and immune cell infiltration (Aldinucci & Colombatti,  
312 2014). In glioblastoma, CCL5 upregulation has been correlated with recurrence in post-treatment  
313 tumors (Hudson et al., 2018). In triple-negative breast cancer, CCL5 expression has also been  
314 correlated with residual tumor size and tumor infiltrating lymphocytes after neoadjuvant  
315 chemotherapy (Araujo et al., 2018). However, CCL5 has not previously been implicated in residual  
316 cell survival or recurrence in Her2+ or hormone receptor positive breast cancer. By analyzing gene  
317 expression datasets from breast cancer patients treated with neoadjuvant targeted or chemotherapy  
318 (Creighton et al., 2009; Tempfer, 2011), we show here that CCL5 expression is elevated in residual  
319 tumor cells that survive therapy. A notable observation in our study is that while CCL5 expression  
320 promoted recurrence (Figure 4C), knockout of CCL5 in tumor cells did not delay recurrence  
321 (Figure 4E). This suggests that CCL5 may be at least partially redundant with other chemokines,  
322 such as CCL2 and CXCL1 and 2, in recruiting macrophages to promote recurrence.

323 Mechanistically, we show that CCL5 acts to recruit CCR5+ macrophages to residual  
324 tumors, consistent with its known role as a chemoattractant factor for macrophages (Mantovani et  
325 al. 2017). RNAseq analysis of primary and recurrent TAMs suggested that recurrent TAMs have  
326 high expression of genes encoding fibrillar collagen and proteins required for collagen deposition.  
327 qPCR analysis indicated that residual TAMs shared this gene expression program. Consistent with

328 this, collagen deposition is high in residual and recurrent tumors, and CCL5 expression promotes  
329 collagen deposition. Collagen deposition is traditionally thought to be driven by fibroblasts in the  
330 microenvironment (Thannickal, 2012). However, a recent report showed that macrophages are  
331 responsible for collagen deposition in a mouse model of colorectal cancer (Afik et al., 2016).  
332 Collagen deposition is important for tumor progression and invasiveness (Provenzano et al., 2008).  
333 Collagen bundles can potentiate cell migration and increase tissue stiffness, and enzymes which  
334 crosslink collagens are often upregulated in breast cancer and are correlated with a poor prognosis  
335 (P. Lu, Weaver, & Werb, 2012). It is possible that collagen deposition may promote the survival  
336 or proliferation of residual tumor cells, and that this mediates the effect of CCL5 on tumor  
337 recurrence.

338 The findings reported here suggest that efforts to block CCL5-driven macrophage  
339 infiltration and subsequent collagen deposition may have therapeutic benefit. Possible therapies  
340 include the use of Maraviroc, a CCR5 antagonist (Velasco-Velazquez et al., 2012), and agents that  
341 block macrophage infiltration or function, such as the CSF-1R inhibitor PLX3397 (DeNardo et al.,  
342 2011; Strachan et al., 2014; Zhu et al., 2014). It is also possible that, because CCL5 is sufficient  
343 but not necessary for tumor recurrence, it would be preferable to block the induction of the pro-  
344 inflammatory program that is induced following Her2 downregulation using agents targeting  
345 TNF $\alpha$  or the NF $\kappa$ B pathway.

346 It is important to note that while our studies focus on the function of CCL5 in recruiting  
347 CCR5+ macrophages, breast cancer cells themselves can also express CCR5. Indeed, previous  
348 studies have found that CCR5 acts in tumor cells to promote stem cell expansion and metastasis  
349 in breast cancer (Jiao et al., 2018; Velasco-Velazquez et al., 2012). Although in the current study  
350 we find that in residual tumors CCR5 is expressed at higher levels in macrophages than on tumor

351 cells, it is possible that tumor cell-expressed CCR5 may mediate at least some of the effects of  
 352 CCL5 on tumor recurrence. Future work with mice lacking CCR5 on specific cell types will clarify  
 353 the relative important of CCR5 on macrophages and tumor cells.

354 The survival and recurrence of residual tumor cells is a critical clinical problem in breast  
 355 cancer. The results identified here show that interactions between residual tumor cells and their  
 356 microenvironment are critical for recurrent tumor formation. Targeting tumor cell-  
 357 microenvironment interactions may hold promise for preventing recurrent breast cancer.

358

## 359 MATERIALS AND METHODS

### 360 Key resources table

| Reagent type (species) or resource | Designation        | Source or reference | Identifiers                           | Additional Information                          |
|------------------------------------|--------------------|---------------------|---------------------------------------|-------------------------------------------------|
| Recombinant DNA reagent            | pLenti CMV GFP Neo | Addgene             | Plasmid # 17447<br>RRID:Addgene_17447 | Campeau et al PLoS One. 2009 Aug 6;4(8):e6529   |
| Recombinant DNA reagent            | lentiCas9-Blast    | Addgene             | Plasmid # 52962<br>RRID:Addgene_52962 | Sanjana et al Nat Methods. 2014 Aug;11(8):783-4 |
| Recombinant DNA reagent            | lentiGuide-Puro    | Addgene             | Plasmid # 52963<br>RRID:Addgene_52963 | Sanjana et al Nat Methods. 2014 Aug;11(8):783-4 |
| Recombinant DNA reagent            | psPAX2             | Addgene             | Plasmid # 12260<br>RRID:Addgene_12260 | Trono Lab Packing and Envelope Plasmids         |
| Recombinant DNA reagent            | pMD2.G             | Addgene             | Plasmid# 12259<br>RRID:Addgene_12259  | Trono Lab Packing and Envelope Plasmids         |

|                                  |                                   |                                  |                                 |                            |
|----------------------------------|-----------------------------------|----------------------------------|---------------------------------|----------------------------|
| Cell line ( <i>M. musculus</i> ) | NIH-3T3                           | American Type Culture Collection | Cat# CRL-1658<br>RRID:CVCL_0594 |                            |
| Cell line ( <i>M. musculus</i> ) | 54074                             | This paper                       |                                 | Derived from MTB;TAN model |
| Cell line ( <i>M. musculus</i> ) | 99142                             | This paper                       |                                 | Derived from MTB;TAN model |
| Cell line ( <i>H. Sapiens</i> )  | 293T Ampho                        | American Type Culture Collection | Cat# CRL-3213<br>RRID:CVCL_H716 |                            |
| Cell line ( <i>H. Sapiens</i> )  | 293T Eco                          | American Type Culture Collection | Cat# CRL-3214<br>RRID:CVCL_H717 |                            |
| Antibody                         | Rabbit monoclonal anti-NFκB p65   | Cell Signaling                   | D14E12<br>RRID:AB_10859369      | 1:1000 (WB)                |
| Antibody                         | Rabbit monoclonal anti-p-NFκB p65 | Cell Signaling                   | 93H1<br>RRID:AB_10827881        | 1:1000 (WB)                |
| Antibody                         | Mouse monoclonal anti-Tubulin     | Santa Cruz                       | TU-02<br>RRID:AB_628408         | 1:1000 (WB)                |
| Antibody                         | Goat anti-rabbit HRP              | Cell Signaling                   | Cat# 7074<br>RRID:AB_2099233    | 1:5000 (WB)                |
| Antibody                         | Goat anti-mouse HRP               | Cell Signaling                   | Cat# 7076<br>RRID:AB_330924     | 1:5000 (WB)                |
| Antibody                         | Goat anti-rabbit Alexa Flour 680  | Life Technologies                | Cat# A21076<br>RRID:AB_141386   | 1:5000 (WB)                |

|          |                                                                   |                                       |                                  |             |
|----------|-------------------------------------------------------------------|---------------------------------------|----------------------------------|-------------|
| Antibody | IRDYE 800CW Goat anti-mouse                                       | LI-COR                                | Cat# 926-32210<br>RRID:AB_621842 | 1:5000 (WB) |
| Antibody | Rat monoclonal anti-CD45R/B220, APC conjugated                    | Invitrogen/eBioscience (Carlsbad, CA) | RA3-6B2<br>RRID:AB_469395        | 1:50 (FC)   |
| Antibody | Hamster monoclonal anti-CD49b, AF488 conjugated                   | BioLegend                             | HM $\alpha$ 2<br>RRID:AB_492851  | 1:200 (FC)  |
| Antibody | Hamster monoclonal anti-Fc $\epsilon$ RI $\alpha$ , PE conjugated | BioLegend                             | 1-Mar<br>RRID:AB_1626104         | 1:50 (FC)   |
| Antibody | Rat monoclonal anti-Siglec-F/CD170, PE conjugated                 | BD                                    | E50-2440<br>RRID:AB_10896143     | 1:200 (FC)  |
| Antibody | Rat monoclonal anti-PDGFR $\alpha$ /CD140a, PE conjugated         | Invitrogen/eBioscience                | APA5<br>RRID:AB_657615           | 1:100 (FC)  |
| Antibody | Rat monoclonal anti-CD45, PECy5 conjugated                        | BD                                    | 30-F11<br>RRID:AB_394612         | 1:200 (FC)  |
| Antibody | Mouse monoclonal anti-CD45, APC conjugated                        | BD                                    | 30-F11<br>RRID:AB_1645215        | 1:200 (FC)  |
| Antibody | Rat anti-CD45, V50 conjugated                                     | BD                                    | 30-F11<br>RRID:AB_1645275        | 1:200 (FC)  |



|          |                                                  |    |                             |            |
|----------|--------------------------------------------------|----|-----------------------------|------------|
| Antibody | Rat monoclonal anti-F4/80, AF647 conjugated      | BD | T45-2342<br>RRID:AB_2744474 | 1:50 (FC)  |
| Antibody | Rat monoclonal anti-CD11b, PE conjugated         | BD | M1/70<br>RRID:AB_394775     | 1:50 (FC)  |
| Antibody | Rat monoclonal anti-CD11b, PECy7 conjugated      | BD | M1/70<br>RRID:AB_2033994    | 1:100 (FC) |
| Antibody | Rat monoclonal anti-Ly6G, APC conjugated         | BD | 1A8<br>RRID:AB_1727560      | 1:200 (FC) |
| Antibody | Hamster monoclonal anti-CD3e, PE conjugated      | BD | 145-2C11<br>RRID:AB_394460  | 1:100 (FC) |
| Antibody | Rat monoclonal anti-CD4, APCC7y conjugated       | BD | GK1.5<br>RRID:AB_394331     | 1:100 (FC) |
| Antibody | Rat monoclonal anti-CD8a, APC conjugated         | BD | 53-6.7<br>RRID:AB_398527    | 1:200 (FC) |
| Antibody | Rat monoclonal anti-CD16/CD32 Fc Blocker         | BD | 2.4G2<br>RRID:AB_394659     | 1:50 (FC)  |
| Antibody | Rat monoclonal anti-CCR5/CD195, BV421 conjugated | BD | C34-3448<br>RRID:AB_2741677 | 1:100 (FC) |

|                              |                                    |                                                                 |                            |              |
|------------------------------|------------------------------------|-----------------------------------------------------------------|----------------------------|--------------|
| Antibody                     | Mouse monoclonal anti-Cytokertin 8 | Troma 1, Brulet, P., Kemler, R. Institut Pasteur, Paris, France | Troma 1<br>RRID:AB_531826  | 1:50 (IHC)   |
| Antibody                     | Rat monoclonal anti-CD45           | BD Biosciences                                                  | 30-F11<br>RRID:AB_394606   | 1:200 (IHC)  |
| Antibody                     | Rabbit monoclonal anti-CD3         | Thermo                                                          | SP7<br>RRID:AB_1956722     | 1:100 (IHC)  |
| Antibody                     | Rat monoclonal anti-F4/80          | Bio-Rad                                                         | Cl:A3-1<br>RRID:AB_1102558 | 1:1000 (IHC) |
| Peptide, recombinant protein | TNF $\alpha$ , mouse               | BioLegend                                                       | Cat# 575202                | 10 ng/mL     |
| Commercial assay or kit      | Trichrome stain                    | Abcam                                                           | ab150686                   |              |
| Commercial assay or kit      | Vectastain ABC Kit (Rabbit IgG)    | Vector Labs                                                     | Cat# PK-6101               |              |
| Commercial assay or kit      | Vectastain ABC Kit (Rat IgG)       | Vector Labs                                                     | Cat# PK-4004               |              |
| Commercial assay or kit      | RNeasy Mini Kit                    | Qiagen                                                          | Qiagen:74106               |              |
| Commercial assay or kit      | QIAshredder                        | Qiagen                                                          | Qiagen:79656               |              |
| Commercial assay or kit      | Quantibody Mouse Cytokine Array Q1 | RayBiotech                                                      | Cat# QAM-CYT-1-1           |              |
| Commercial                   | Quantibody Mouse                   | RayBiotech                                                      | Cat# QAM-CYT-4             |              |

|                         |                                                   |                   |                                   |                                                                                                   |
|-------------------------|---------------------------------------------------|-------------------|-----------------------------------|---------------------------------------------------------------------------------------------------|
| assay or kit            | Cytokine Array Q4                                 |                   |                                   |                                                                                                   |
| Chemical compound, drug | IKK16                                             | Selleckchem       | Cat# S2882                        | 100nM                                                                                             |
| Chemical compound, drug | Lipofectamine 2000                                | Life Technologies | Cat# 11668019                     | 60 $\mu$ L per reaction                                                                           |
| Chemical compound, drug | Polybrene                                         | Sigma             | Cat# 107689                       | 6 $\mu$ g/mL                                                                                      |
| Chemical compound, drug | 2x Cell Lysis Buffer                              | RayBiotech        | Cat# AA-LYS                       |                                                                                                   |
| Chemical compound, drug | Luminata Classico/Crescendo Western HRP Substrate | Millipore         | Cat#WBLUC0500 Cat#WBLUR0500       |                                                                                                   |
| Chemical compound, drug | Doxycycline                                       | RPI               | Cat# D43020-100.0                 | 2 mg/kg <i>in vivo</i> and 2 $\mu$ g/mL <i>in vitro</i>                                           |
| Sequence-based reagent  | RT-PCR primers                                    | This paper        | CCL5 cDNA into pK1 plasmid        | Forward:<br>TAACCTCGAGATGAAGATC<br>TCTGCAGCTG, Reverse:<br>TAACGCGGCCCGCCAGGGTC<br>AGAATCAAGAAACC |
| Sequence-based reagent  | RT-PCR primers                                    | This paper        | CCL5 cDNA into pLenti CMV plasmid | Forward:<br>TAACTCTAGAATGAAGATC<br>TCTGCAGCTG, Reverse:<br>TAACGTCGACCAGGGTCAG<br>AATCAAGAAACC    |

|                          |         |            |                   |                                                                                                       |
|--------------------------|---------|------------|-------------------|-------------------------------------------------------------------------------------------------------|
| Sequencing-based reagent | gRNAs   | This paper | Targeting CCL5    | CCL5_1<br>(TG TAGAAATACTCCTTGACG), CCL5_2<br>(TACTCCTTGACGTGGGCACG), CCL5_3<br>(TGCAGAGGGCGGCTGCAGTG) |
| Sequencing-based reagent | CCL5    | Thermo     | Mm0130242<br>7_m1 |                                                                                                       |
| Sequencing-based reagent | CXCL1   | Thermo     | Mm0420746<br>0_m1 |                                                                                                       |
| Sequencing-based reagent | CXCL2   | Thermo     | Mm0043645<br>0_m1 |                                                                                                       |
| Sequencing-based reagent | CXCL5   | Thermo     | Mm0043645<br>1_g1 |                                                                                                       |
| Sequencing-based reagent | CCL2    | Thermo     | Mm0044124<br>2_m1 |                                                                                                       |
| Sequencing-based reagent | Actin   | Thermo     | Mm0261958<br>0_g1 |                                                                                                       |
| Sequencing-based reagent | ASPN    | Thermo     | Mm0044594<br>5_m1 |                                                                                                       |
| Sequencing-based reagent | PCOLCE  | Thermo     | Mm0047660<br>8_m1 |                                                                                                       |
| Sequencing-based reagent | COL5A1  | Thermo     | Mm0048929<br>9_m1 |                                                                                                       |
| Sequencing-based reagent | COL24A1 | Thermo     | Mm0132374<br>4_m1 |                                                                                                       |

|                     |                |                                                                            |                 |                                                                                            |
|---------------------|----------------|----------------------------------------------------------------------------|-----------------|--------------------------------------------------------------------------------------------|
| based reagent       |                |                                                                            |                 |                                                                                            |
| Software, algorithm | GraphPad Prism | GraphPad Prism ( <a href="https://graphpad.com">https://graphpad.com</a> ) | RRID:SCR_002798 | Version 8                                                                                  |
| Software, algorithm | JMP Pro        | SAS Institute Inc., Cary, NC                                               |                 |                                                                                            |
| Software, algorithm | FlowJo         | TreeStar                                                                   | RRID:SCR_008520 |                                                                                            |
| Software, algorithm | Fiji           | Fiji ( <a href="http://fiji.nih.gov/">http://fiji.nih.gov/</a> )           | RRID:SCR_002285 | Schindelin, J.; Arganda-Carreras, I. & Frise, E. et al. (2012) Nature methods 9(7):676-682 |

361 **WB = Western blot, FC = flow cytometry, IHC = immunohistochemistry**

362 **Orthotopic recurrence assays**

363 Orthotopic tumor recurrence assays were performed as described (Alvarez et al. 2013).  
 364 Briefly, cohorts of 6-week old recipient mice (nu/nu or TAN) on doxycycline were injected  
 365 bilaterally in the #4 inguinal mammary fat pad with  $1 \times 10^6$  primary tumor cells (expressing either  
 366 a control sgRNA, a sgRNA targeting CCL5, CCL5 cDNA, or GFP cDNA). Once tumors reached  
 367 5 mm (2-3 weeks), doxycycline was removed to initiate oncogene down-regulation and tumor  
 368 regression. Mice were palpated biweekly to monitor tumor recurrence, and sacrificed when  
 369 recurrent tumors reached 10 mm. Differences in recurrence-free survival between control and  
 370 experimental cohorts were compared using Kaplan-Meier survival curves (L, Kaplan, & Meier,  
 371 1958) and evaluated by the p-value from a log-rank test and the hazard ratio from the Cox  
 372 proportional hazard regression, as described previously (Alvarez et al., 2013).

373 Power calculations were used to determine cohort size for each in vivo experiment.  
 374 Briefly, in order to detect a 2.5-fold difference in recurrence-free survival between control and

375 experimental groups, given a median recurrence-free survival of 60 days for the control group and  
376 a 300-day follow-up, we estimated we would need to enroll 22 tumors per group (80% power,  
377  $p < 0.05$ ). We enrolled extra mice in each cohort to account for tumor take rates and unexpected  
378 mortality. Final cohort sizes were: GFP tumors, 17 mice (34 tumors); CCL5 tumors, 18 mice (36  
379 tumors); sgControl tumors, 20 mice (40 tumors); sgCCL5 tumors, 20 mice (40 tumors).

### 380 **Tissue culture and reagents**

381 Cell lines derived from primary MTB;TAN tumors were grown as previously described in  
382 media containing 2  $\mu\text{g/ml}$  dox (Alvarez et al., 2013). For conditioned media experiments, primary  
383 tumor cell lines were plated on 10-cm plates. 24 hours later, media was changed to media without  
384 dox, and conditioned media was collected one or two days later. Media was centrifuged to remove  
385 cells, supplemented with 2  $\mu\text{g/ml}$  dox, and applied to naïve primary tumor cells. Cells treated with  
386 conditioned media were harvested one or two days later for qPCR or Western blot analysis. For  
387 dox withdrawal experiments, primary tumor cell lines were plated 10-cm plates. 24 hours later,  
388 media was changed to media without dox and cells were collected one or two days later for qPCR  
389 or Western blot analysis. IKK16 (Selleckchem, Houston, TX) was used at 100 nM, TNF $\alpha$   
390 (BioLegend, San Diego, CA) was used at 10 ng/ml.

391 Primary cells derived from MTB;TAN tumors (54074 and 99142 cells) were generated by  
392 our lab, are used at early passages, and as a result have not been authenticated. NIH3T3 cells were  
393 tested by the Duke Cell Culture Facility for mycoplasma contamination and tested negative. The  
394 facility was not able to perform STR authentication on these mouse cells.

395

### 396 **Flow cytometry**

397 Tumors were harvested and digested as previously described (Mabe et al., 2018). Cells  
 398 were aliquoted at  $1 \times 10^6$  cells per 5 mL falcon tube. CD16/CD32 Fc Block antibody was added for  
 399 10 min at 4°C (2  $\mu$ L/ $1 \times 10^6$  cells). Tumors were then stained with antibody cocktails listed below  
 400 for 30 min at 4°C, and then washed 3 times with FACs buffer (BD Biosciences, Billerica, MA).

| Cell Type            | Antibody                  | Fluorophore | Clone         | Vendor                                | Dilution |
|----------------------|---------------------------|-------------|---------------|---------------------------------------|----------|
| B Cell               | CD45R/B220                | APC         | RA3-6B2       | Invitrogen/eBioscience (Carlsbad, CA) | 1:50     |
| Basophil             | CD49b                     | AF488       | HM $\alpha$ 2 | BioLegend                             | 1:200    |
| Basophil             | Fc $\epsilon$ RI $\alpha$ | PE          | MAR-1         | BioLegend                             | 1:50     |
| Eosinophil           | Siglec-F/CD170            | PE          | E50-2440      | BD                                    | 1:200    |
| Fibroblast           | PDGFR $\alpha$ /CD140a    | PE          | APA5          | Invitrogen/eBioscience                | 1:100    |
| Leukocyte            | CD45                      | PECy5       | 30-F11        | BD                                    | 1:200    |
| Leukocyte            | CD45                      | APC         | 30-F11        | BD                                    | 1:200    |
| Leukocyte            | CD45                      | V450        | 30-F11        | BD                                    | 1:200    |
| Macrophage           | F4/80                     | AF647       | T45-2342      | BD                                    | 1:50     |
| Monocyte/Granulocyte | CD11b                     | PE          | M1/70         | BD                                    | 1:50     |
| Monocyte/Granulocyte | CD11b                     | PECy7       | M1/70         | BD                                    | 1:100    |
| Neutrophil           | Ly6G                      | APC         | 1A8           | BD                                    | 1:200    |
| T Cell               | CD3e                      | PE          | 145-2C11      | BD                                    | 1:100    |
| T Cell               | CD4                       | APCCy7      | GK1.5         | BD                                    | 1:100    |
| T Cell               | CD8a                      | APC         | 53-6.7        | BD                                    | 1:200    |
| -                    | Fc Blocker                | -           | 2.4G2         | BD                                    | 1:50     |
| -                    | CCR5/CD195                | BV421       | C34-3448      | BD                                    | 1:100    |

401  
 402 Cells were analyzed using a FACSCanto analyzer (BD Biosciences) and data were analyzed using  
 403 FlowJo software (TreeStar, Ashland, OR). Gating of the CCR5-high population was determined  
 404 by using a fluorescence minus one (FMO; cells stained with antibodies for cell type markers,  
 405 lacking the CCR5 antibody) histogram in the fluorescence channel for the CCR5 antibody as a

406 negative control. The FMO negative control histogram was plotted with a positive control of the  
407 single stain (cells stained only with CCR5 antibody) from the same tumor. Percent of CCR5+ cells  
408 were gated according to the positive control.

#### 409 **qPCR**

410 RNA was isolated from tumors and cells using RNeasy columns (Qiagen, Hilden,  
411 Germany). 1 µg of RNA was reversed transcribed using cDNA synthesis reagents (Promega,  
412 Madison, WI). qPCR was performed using 6-carboxyfluorescein labeled TaqMan probes  
413 (Thermo, Waltham, MA): CCL5 (Mm01302427\_m1), CXCL1 (Mm04207460\_m1), CXCL2  
414 (Mm00436450\_m1), CXCL5 (Mm00436451\_g1), CCL2 (Mm00441242\_m1), Actin  
415 (Mm02619580\_g1), ASPN (Mm00445945\_m1), PCOLCE (Mm00476608\_m1), COL5A1  
416 (Mm00489299\_m1), COL24A1 (Mm01323744\_m1), and read on a Bio-Rad (Hercules, CA)  
417 CFX qPCR machine.

#### 418 **Western blotting and cytokine arrays**

419 Western blotting was performed as described (Alvarez et al. 2013) using the following  
420 antibodies: NFκB p65 (D14E12, Cell Signaling, Danvers, MA), p-NFκB p65 (93H1, Cell  
421 Signaling), and tubulin (TU-02, Santa Cruz, Dallas, TX), all at a 1:1000 dilution. Secondary  
422 antibodies conjugated to Alexa Flour 680 (Life Technologies, Carlsbad, CA) or 800 (LI-COR  
423 Biosciences, Lincoln, NE) were detected with the Odyssey detection system (LI-COR  
424 Biosciences). For p-p65 detection, secondary antibodies conjugated to HRP were used and blots  
425 were developed using Classico or Crescendo reagent (Millipore, Burlington, MA) and exposed to  
426 film (VWR, Radnor, PA). Secondary antibodies were used at a 1:5000 dilution.

427 For cytokine array analysis, tumor lysates were made in 2X lysis buffer (RayBiotech,  
428 Norcross, GA) and diluted to 50 µg per 100 µL in diluent provided. Tumor lysates and standards



429 were run on both Quantibody Mouse Cytokine Array Q1 and Q4 (RayBiotech). Slides were  
430 scanned and quantified by RayBiotech.

### 431 **Plasmids and CRISPR/Cas9**

432 pLenti CMV GFP Puro was purchased from Addgene (Watertown, MA).

433 A CCL5 cDNA encoding the full-length mouse protein was amplified by RT-PCR from  
434 recurrent MTB;TAN tumor cells and cloned into the retroviral expression vector pK1 using the  
435 following primers: Forward: TAACCTCGAGATGAAGATCTCTGCAGCTG, Reverse:  
436 TAACGCGGCCGCCAGGGTCAGAATCAAGAAACC.

437 A CCL5 cDNA encoding the full-length mouse protein was amplified by RT-PCR from  
438 recurrent MTB;TAN tumor cells and cloned into the lentiviral expression vector pLenti CMV  
439 using the following primers: Forward: TAACTCTAGAATGAAGATCTCTGCAGCTG, Reverse:  
440 TAACGTCGACCAGGGTCAGAATCAAGAAACC.

441 CCL5 CRISPR sgRNAs: CCL5\_1 (TG TAGAAATACTCCTTGACG), CCL5\_2  
442 (TACTCCTTGACGTGGGCACG), CCL5\_3 (TGCAGAGGGCGGCTGCAGTG). A small guide  
443 against AAVS was used as control. sgRNAs were cloned into Lentiguide puro (Sanjana et al.  
444 2014). Cas9 infection was with lentiguide Cas9 blast (Sanjana et al. 2014).

445 Retrovirus was produced by transfecting the packaging lines 293T Ampho and 293T Eco  
446 with the retroviral construct pK1 empty or CCL5 using Lipofectamine 2000. Retroviral  
447 supernatant was collected 48 hours post-transfection, filtered, and used to transduce cells in the  
448 presence of 6 µg/mL polybrene (Sigma, St. Louis, MO).

449 Lentivirus was produced by transfecting 293T cells with the packaging plasmids psPAX2  
450 and pMD2.G and lentiviral construct pLenti CMV GFP or CCL5 using Lipofectamine 2000.

451 Lentiviral supernatant was collected 48 hours post-transfection, filtered, and used to transduce  
452 cells in the presence of 6 µg/mL polybrene (Sigma).

### 453 **RNA sequencing**

454 RNA was isolated from tumors or tumor cells using RNeasy columns (Qiagen). For TAM  
455 sequencing, macrophages were isolated by FACS using the antibody panel described above, and  
456 RNA was isolated using RNeasy columns (Qiagen). RNA was sequenced using the Illumina HiSeq  
457 4000 libraries and sequencing platform with 50 base pair single end reads by the Duke GCB  
458 Sequencing and Genomic Technologies Shared Resource (Durham, NC). Sequencing data have  
459 been deposited in SRA as PRJNA506006 for cell line data and PRJNA505845 for macrophage  
460 data.

### 461 **Human breast cancer microarray data**

462 Publicly available microarray data from human primary and residual breast cancer datasets  
463 GSE10281 and GSE21974 and their corresponding clinical annotation were downloaded,  
464 converted to log<sub>2</sub> scale, and median centered. Heatmaps were created using R (Team, 2013).

### 465 **Immunohistochemistry and staining**

466 Tumor sections were fixed in 10% normal formalin for 16 hours, then washed twice with  
467 PBS and transferred to 70% ethanol for storage. Stored tumor sections were paraffin imbedded  
468 and cut on the microtome in 5 µm sections. Sections were stained using a regressive H&E protocol,  
469 immunohistochemistry, or Masson's Trichrome.

470 The regressive H&E protocol is as follows: dewax and rehydrate slides. Incubate slides in  
471 Harris Modified Hematoxylin with Acetic Acid (Fisher, Hampton, NH) for 5 min. Incubate in  
472 Eosin (Sigma) for 1:30 min. Then dehydrate slides and mount slides with permount and coverslip.  
473 Let dry overnight.

474 For cytokeratin 8 staining (Troma 1, Brulet, P., Kemler, R. Institut Pasteur, Paris, France)  
475 immunohistochemistry slides were dewaxed and rehydrated as above. Slides were boiled in  
476 antigen retrieval buffer (1X in ddH<sub>2</sub>O) for 5 minutes and allowed to cool. Slides were washed in  
477 PBS and then incubated in 0.3% H<sub>2</sub>O<sub>2</sub>. Slides were washed, blocked and stained according to the  
478 protocol from the rabbit secondary Vectastain ABC kit (Vector Labs, Burlingame, CA). Primary  
479 antibody was used at a dilution of 1:50. CD45 (30-F11, BD Biosciences, 1:200), CD3 (SP7,  
480 Thermo, 1:100), and F4/80 (Cl:A3-1, Bio-Rad, 1:1000) staining were performed by the Duke  
481 Pathology core (Durham, NC).

482 Trichrome stain was performed using a staining kit from Abcam (Cambridge, UK)  
483 (ab150686).

#### 484 **Quantifying IHC and Masson's Trichrome in Fiji**

485 To quantify the amount of positive staining for CD3, CD45, and F4/80 and for Masson's  
486 Trichrome, we used Fiji (Schindelin et al., 2012). The 'Color Deconvolution' function was used  
487 to separate the colors into positive staining and hematoxylin for normalization. We then  
488 converted each image to 8-bit and applied a threshold of positive staining to each image and used  
489 this same threshold across all images. We then measured the pixel area of the positive staining  
490 and normalized this to the hematoxylin staining for each image. For the primary tumors and 5-  
491 day -dox tumors, the whole image was used for quantification. For residual tumors we manually  
492 selected regions-of-interest to exclude adipose tissue from the quantification.

#### 493 **Statistical reporting**

494 For GSEA, the normalized enrichment score (NES) is reported. The normalized enrichment  
495 score accounts for differences in gene set size and in correlations between gene sets. The NES is  
496 based on all dataset permutations, to correct for multiple hypothesis testing. The nominal p value

497 is also reported, and is the statistical significance of the enrichment score, without adjustment for  
498 gene set size or multiple hypothesis testing. A reported p value of zero (0.0) indicates an actual p-  
499 value of less than 1/number-of-permutations. (Subramanian et al., 2005)

500 Two-tailed unpaired t-tests were used to analyze significance between primary tumor  
501 samples and all other time points for qPCR, cytokine array, and flow cytometry analysis. For the  
502 cytokine array, appropriate same size was calculated using JMP Pro (SAS Institute Inc., Cary,  
503 NC). A standard deviation of 20% was assumed, with a power of 0.8, fold change of 2, and p-  
504 value (alpha) of 0.05. This power calculation indicated that a sample size of 8 (4 tumors per cohort)  
505 was required. The same parameters were used for sample size calculation for flow cytometry  
506 analysis of control and CCL5-expressing tumors. For recurrence free survival (RFS), statistical  
507 analysis methods are listed in orthotopic recurrence assays.

508 Outliers were never excluded except for in flow cytometry experiments. Tumors that were  
509 >90% CD45+ were excluded from analysis to avoid analyzing tumors with potential contamination  
510 from the inguinal lymph node. For all other experiments where no power analysis was used, sample  
511 size was chosen based upon previous experience (Alvarez et al., 2013).

## 512 **Study approval**

513 Animal care and all animal experiments were performed with the approval of and in  
514 accordance with Duke University IACUC guidelines. Mice were housed under barrier conditions.

## 515 **Funding**

516 This work was funded by the National Cancer Institute (R01 CA208042 to JVA and F31  
517 CA220957 to AW) and by startup funds from the Duke Cancer Institute, the Duke University  
518 School of Medicine and the Whitehead Foundation (to JVA).

## 519 **Acknowledgements**

520           We thank Cui Rong (Duke-NUS, Singapore) for providing technical assistance, as well as  
521 members of the Alvarez lab for providing assistance and helpful discussions. We thank Dr. Mike  
522 Cook (Duke University) and Dr. Brent Hanks (Duke University) for assistance with flow  
523 cytometry. We thank Dr. So Young Kim (Duke University) for reagents for the CRISPR-Cas9 cell  
524 lines. We also thank Dr. Donald McDonnell, Dr. Binita Das, and Dr. Ching-Yi Chang (Duke  
525 University) for providing assistance and reagents for flow cytometry.

526  
527  
528

529 **REFERENCES**

- 530
- 531 Afik, R., Zigmund, E., Vugman, M., Klepfish, M., Shimshoni, E., Pasmanik-Chor, M., . . . Varol,  
532 C. (2016). Tumor macrophages are pivotal constructors of tumor collagenous matrix. *J*  
533 *Exp Med*, 213(11), 2315-2331. doi:10.1084/jem.20151193
- 534 Aldinucci, D., & Colombatti, A. (2014). The inflammatory chemokine CCL5 and cancer  
535 progression. *Mediators Inflamm*, 2014, 292376. doi:10.1155/2014/292376
- 536 Alvarez, J. V., Pan, T.-c., Ruth, J., Feng, Y., Zhou, A., Pant, D., . . . Chodosh, L. A. (2013). Par-  
537 4 Downregulation Promotes Breast Cancer Recurrence by Preventing Multinucleation  
538 following Targeted Therapy. *Cancer Cell*, 24(1), 30-44. doi:10.1016/j.ccr.2013.05.007
- 539 Binnewies, M., Roberts, E. W., Kersten, K., Chan, V., Fearon, D. F., Merad, M., . . . Krummel,  
540 M. F. (2018). Understanding the tumor immune microenvironment (TIME) for effective  
541 therapy. *Nat Med*, 1-10. doi:10.1038/s41591-018-0014-x
- 542 Creighton, C. J., Li, X., Landis, M., Dixon, J. M., Neumeister, V. M., Sjolund, A., . . . Chang, J.  
543 C. (2009). Residual breast cancers after conventional therapy display mesenchymal as  
544 well as tumor-initiating features. *Proc Natl Acad Sci U S A*, 106(33), 13820-13825.  
545 doi:10.1073/pnas.0905718106
- 546 Damrauer, J. S., Phelps, S. N., Amuchastegui, K., Lupo, R., Mabe, N. W., Walens, A., . . .  
547 Alvarez, J. V. (2018). Foxo-dependent Par-4 Upregulation Prevents Long-term Survival  
548 of Residual Cells Following PI3K–Akt Inhibition. *Molecular Cancer Research*.
- 549 Dembic, Z. (2015). *Cytokines of the Immune System: Chemokines*: Academic Press.
- 550 DeNardo, D. G., Brennan, D. J., Rexhepaj, E., Ruffell, B., Shiao, S. L., Madden, S. F., . . .  
551 Coussens, L. M. (2011). Leukocyte Complexity Predicts Breast Cancer Survival and  
552 Functionally Regulates Response to Chemotherapy. *Cancer Discov*, 1(1), 54-67.  
553 doi:10.1158/2159-8274.CD-10-0028
- 554 Flores-Borja, F., Irshad, S., Gordon, P., Wong, F., Sheriff, I., Tutt, A., & Ng, T. (2016).  
555 Crosstalk between Innate Lymphoid Cells and Other Immune Cells in the Tumor  
556 Microenvironment. *Journal of Immunology Research*, 2016(9), 1-14.  
557 doi:10.1155/2016/7803091
- 558 Gong, K., Guo, G., Gerber, D. E., Gao, B., Peyton, M., Huang, C., . . . Habib, A. A. (2018).  
559 TNF-driven adaptive response mediates resistance to EGFR inhibition in lung cancer. *J*  
560 *Clin Invest*, 128(6), 2500-2518. doi:10.1172/JCI96148
- 561 Hata, A. N., Niederst, M. J., Archibald, H. L., Gomez-Caraballo, M., Siddiqui, F. M., Mulvey, H.  
562 E., . . . Engelman, J. A. (2016). Tumor cells can follow distinct evolutionary paths to  
563 become resistant to epidermal growth factor receptor inhibition. *Nat Med*, 22(3), 262-  
564 269. doi:10.1038/nm.4040
- 565 Holohan, C., Van Schaeybroeck, S., Longley, D. B., & Johnston, P. G. (2013). Cancer drug  
566 resistance: an evolving paradigm. *Nature Reviews Cancer*, 13, 714. doi:10.1038/nrc3599
- 567 Hölzel, D., Eckel, R., Emeny, R. T., & Engel, J. (2010). Distant metastases do not metastasize.  
568 *Cancer and Metastasis Reviews*, 29(4), 737-750. doi:10.1007/s10555-010-9260-1
- 569 Klein, C. A. (2009). Parallel progression of primary tumours and metastases. *Nature Reviews*  
570 *Cancer*, 9, 302. doi:10.1038/nrc2627
- 571 L, E., Kaplan, & Meier, P. (1958). Nonparametric Estimation From Incomplete Observations.  
572 *Journal of the American Statistical Association*, 53(282), 457-481.  
573 doi:10.1080/01621459.1958.10501452
- 574 Lacy, P. (2017). Eosinophil Cytokines in Allergy (pp. 173-218): Academic Press.

- 575 Lee, C.-M., Peng, H.-H., Yang, P., Liou, J.-T., Liao, C.-C., & Day, Y.-J. (2017). C-C Chemokine  
576 Ligand-5 is critical for facilitating macrophage infiltration in the early phase of liver  
577 ischemia/reperfusion injury. *Scientific Reports*, 7(1), 3698. doi:10.1038/s41598-017-  
578 03956-7
- 579 López, Á. G., Seoane, J. M., & Sanjuán, M. A. F. (2017). Dynamics of the cell-mediated  
580 immune response to tumour growth. *Phil. Trans. R. Soc. A*, 375(2096), 20160291-  
581 20160214. doi:10.1098/rsta.2016.0291
- 582 Lu, P., Weaver, V. M., & Werb, Z. (2012). The extracellular matrix: A dynamic niche in cancer  
583 progression. *J Cell Biol*, 196(4), 395-406. doi:10.1083/jcb.201102147
- 584 Lu, X., Mu, E., Wei, Y., Riethdorf, S., Yang, Q., Yuan, M., . . . Kang, Y. (2011). VCAM-1  
585 Promotes Osteolytic Expansion of Indolent Bone Micrometastasis of Breast Cancer by  
586 Engaging  $\alpha 4\beta 1$ -Positive Osteoclast Progenitors. *Cancer Cell*, 20(6), 701-714.  
587 doi:10.1016/j.ccr.2011.11.002
- 588 Mabe, N. W., Fox, D. B., Lupo, R., Decker, A. E., Phelps, S. N., Thompson, J. W., & Alvarez, J.  
589 V. (2018). Epigenetic silencing of tumor suppressor Par-4 promotes chemoresistance in  
590 recurrent breast cancer. *J Clin Invest*, 128(10), 4413-4428. doi:10.1172/JCI99481
- 591 Meads, M. B., Gatenby, R. A., & Dalton, W. S. (2009). Environment-mediated drug resistance: a  
592 major contributor to minimal residual disease. *Nature Reviews Cancer*, 9, 665.  
593 doi:10.1038/nrc2714
- 594 Moody, S. E. (2002). Conditional activation of Neu in the mammary epithelium of transgenic  
595 mice results in reversible pulmonary metastasis. *Cancer Cell*, 2(6), 451-461.
- 596 Neville-Webbe, H. L., Cross, N. A., Eaton, C. L., Nyambo, R., Evans, C. A., Coleman, R. E., &  
597 Holen, I. (2004). Osteoprotegerin (OPG) produced by bone marrow stromal cells protects  
598 breast cancer cells from TRAIL-induced apoptosis. *Breast Cancer Res Treat*, 86(3), 269-  
599 279.
- 600 Pollard, J. W. (2004). Opinion: Tumour-educated macrophages promote tumour progression and  
601 metastasis. *Nature Reviews Cancer*, 4(1), 71-78. doi:10.1038/nrc1256
- 602 Provenzano, P. P., Inman, D. R., Eliceiri, K. W., Knittel, J. G., Yan, L., Rueden, C. T., . . .  
603 Keely, P. J. (2008). Collagen density promotes mammary tumor initiation and  
604 progression. *BMC Medicine*, 6(1), 11. doi:10.1186/1741-7015-6-11
- 605 Sequist, L. V., Waltman, B. A., Dias-Santagata, D., Digumarthy, S., Turke, A. B., Fidias, P., . . .  
606 Engelman, J. A. (2011). Genotypic and histological evolution of lung cancers acquiring  
607 resistance to EGFR inhibitors. *Science Translational Medicine*, 3(75), 75ra26-75ra26.  
608 doi:10.1126/scitranslmed.3002003
- 609 Sharma, S. V., Lee, D. Y., Li, B., Quinlan, M. P., Takahashi, F., Maheswaran, S., . . . Settleman,  
610 J. (2010). A Chromatin-Mediated Reversible Drug-Tolerant State in Cancer Cell  
611 Subpopulations. *Cell*, 141(1), 69-80. doi:10.1016/j.cell.2010.02.027
- 612 Soria, G., & Ben-Baruch, A. (2008). The inflammatory chemokines CCL2 and CCL5 in breast  
613 cancer. *Cancer Lett*, 267(2), 271-285. doi:10.1016/j.canlet.2008.03.018
- 614 Sosa, M. S., Avivar-Valderas, A., Bragado, P., Wen, H.-C., & Aguirre-Ghiso, J. A. (2011).  
615 ERK1/2 and p38 $\alpha/\beta$  Signaling in Tumor Cell Quiescence: Opportunities to Control  
616 Dormant Residual Disease. *Clinical Cancer Research*, 17(18), 5850-5857.  
617 doi:10.1158/1078-0432.CCR-10-2574
- 618 Strachan, D. C., Ruffell, B., Oei, Y., Bissell, M. J., Coussens, L. M., Pryer, N., & Daniel, D.  
619 (2014). CSF1R inhibition delays cervical and mammary tumor growth in murine models



620 by attenuating the turnover of tumor-associated macrophages and enhancing infiltration  
621 by CD8 +T cells. *OncoImmunology*, 2(12), e26968-26913. doi:10.4161/onci.26968  
622 Subramanian, A., Tamayo, P., Mootha, V. K., Mukherjee, S., Ebert, B. L., Gillette, M. A., . . .  
623 Mesirov, J. P. (2005). Gene set enrichment analysis: a knowledge-based approach for  
624 interpreting genome-wide expression profiles. *Proc Natl Acad Sci U S A*, 102(43), 15545-  
625 15550. doi:10.1073/pnas.0506580102  
626 Team, R. C. (2013). R: A language and environment for statistical computing. . *R Foundation for*  
627 *Statistical Computing, Vienna, Austria*.  
628 Tempfer, C. (2011). Basal-like molecular subtype and HER4 up-regulation and response to  
629 neoadjuvant chemotherapy in breast cancer. *Oncol Rep*. doi:10.3892/or.2011.1392  
630 Thannickal, V. J. (2012). Mechanisms of pulmonary fibrosis: role of activated myofibroblasts  
631 and NADPH oxidase. *Fibrogenesis & tissue repair*, 5(Suppl 1), S23-S23.  
632 doi:10.1186/1755-1536-5-S1-S23  
633 Velasco-Velazquez, M., Jiao, X., De La Fuente, M., Pestell, T. G., Ertel, A., Lisanti, M. P., &  
634 Pestell, R. G. (2012). CCR5 Antagonist Blocks Metastasis of Basal Breast Cancer Cells.  
635 *Cancer Res*, 72(15), 3839-3850. doi:10.1158/0008-5472.CAN-11-3917  
636 Zhu, Y., Knolhoff, B. L., Meyer, M. A., Nywening, T. M., West, B. L., Luo, J., . . . DeNardo, D.  
637 G. (2014). CSF1/CSF1R Blockade Reprograms Tumor-Infiltrating Macrophages and  
638 Improves Response to T-cell Checkpoint Immunotherapy in Pancreatic Cancer Models.  
639 *Cancer Res*, 74(18), 5057-5069. doi:10.1158/0008-5472.CAN-13-3723  
640

641



642 **Figure Legends**

643

644 **Figure 1) Her2 downregulation induces an inflammatory gene expression program driven**

645 **by the TNF $\alpha$ /IKK pathway. (a)** RNA-seq analysis of two independent primary Her2-driven

646 tumor cell lines in the presence of Her2 expression (+dox) or two days following Her2

647 downregulation (-dox). The heatmap shows the top 100 differentially expressed genes between

648 +dox and -dox conditions. R1 and R2 are biological replicates. **(b)** Gene set enrichment analysis

649 (GSEA) of RNA-seq data showing enrichment of an inflammatory response signature and a

650 TNF $\alpha$ /NF- $\kappa$ B signature in cells following Her2 downregulation. P-values and normalized

651 enrichment scores (NES) are shown. **(c)** Heatmap showing expression of select genes from the

652 TNF $\alpha$ /NF- $\kappa$ B signature in the presence of Her2 expression (+dox) or following Her2 deinduction

653 (-dox). **(d)** qRT-PCR analysis of CCL5 expression following 1 or 2-day treatment with conditioned

654 media harvested from primary cells following Her2 downregulation. Dox was added to

655 conditioned media prior to treatment to maintain Her2 expression in target cells. Results shown

656 are representative of two independent experiments. **(e)** qRT-PCR of TNF $\alpha$  expression in primary

657 cells in the presence of Her2 expression (+dox) or 2 and 4 days following Her2 downregulation.

658 Results shown are representative of two independent experiments. **(f)** Primary tumor cells were

659 treated with conditioned media as described in (d), and activation of the NF- $\kappa$ B pathway was

660 assessed by Western blot analysis of total and phospho-p65. Results show 3 biological replicates

661 per time point. **(g)** qRT-PCR analysis of the indicated genes in primary tumor cells in the presence

662 of Her2 expression (+dox) or 1 and 2 days following Her2 downregulation (-dox). At the time of

663 Her2 downregulation, cells were treated with the pan-IKK inhibitor IKK16 (100 nM) or vehicle

664 control. Results show the average of 3 biological replicates per condition.

665 Error bars denote mean  $\pm$  SEM. Significance was determined using a two-tailed Student's t-test.

666

667 **Figure 1 – figure supplement 1** (a) qRT-PCR analysis of Erbb2 expression in primary cells with  
668 Her2 on (+dox) or Her2 off (-dox). (b) Gene set enrichment analysis (GSEA) of RNA-seq data  
669 showing an E2F gene signature is enriched in cells with Her2 signaling on. P-values and  
670 normalized enrichment scores (NES) are shown. (c) Western blot showing p65 phosphorylation in  
671 primary tumor cells treated with the indicated concentration of Neratinib for 24 hours, or 24 hours  
672 following dox withdrawal. (d-f) qRT-PCR analysis of TNF $\alpha$ , CCL5, and CXCL5 expression 24  
673 hours after treatment with 0.1  $\mu$ M Neratinib. (g) qRT-PCR analysis of CCL2, CCL5, and CXCL5  
674 expression in NIH-3T3 treated with 2  $\mu$ g/mL dox, 10 ng/mL TNF $\alpha$ , or both for 24 hours. (h) qRT-  
675 PCR analysis of Erbb2 expression of cells treated with -dox conditioned media with dox  
676 supplementation. (i) Primary tumor cells were treated with +dox conditioned media and activation  
677 of the NF- $\kappa$ B pathway was assessed by Western blot analysis of total and phospho-p65. Results  
678 show 2 biological replicates per time point.

679

680 **Figure 2) Immune cell infiltration during tumor regression and residual disease.** (a) H&E-  
681 stained section of a representative residual tumor from a previously tumor-bearing MTB/TAN  
682 mouse. Insets show higher-magnification view of residual tumor cells (left) and staining for CK8  
683 (right). (b-d) Representative images of a primary tumor (b), regressing tumor (5 days -dox) (c),  
684 and residual tumor (d), stained with H&E, Masson's Trichome (MT), CD45, or F4/80. Primary  
685 tumors show little collagen deposition and only modest leukocyte infiltration. Her2  
686 downregulation leads to infiltration of CD45+ cells, predominantly F4/80+ macrophages. Residual  
687 tumors have abundant collagen deposition and leukocyte infiltration.

688

689 **Figure 2 – figure supplement 1** (a) CD3 staining of representative MTB;TAN primary, 5 days -  
690 dox, and residual tumors. (b) Bright-field and fluorescent images of a representative GFP-labeled  
691 orthotopic residual tumor in the context of a non-fluorescent mammary gland. (c) Quantification  
692 of IHC and MT staining of primary, regressing, and residual tumors from the MTB;TAN model.  
693 (d-f) F4/80 staining of representative orthotopic primary, 5 days -dox, and residual tumors showing  
694 macrophage infiltration.

695

696 **Figure 3) Differential cytokine expression in residual tumors.** (a) Volcano plot showing  
697 differential cytokine expression between primary and residual tumors. Antibody-based cytokine  
698 arrays were used to measure cytokine expression in orthotopic primary tumors or microdissected  
699 residual tumors. Cytokines that are upregulated (fold change >2, p-value <0.1) in dormant tumors  
700 are in red, and downregulated cytokines (fold change <-2, p-value <0.1) are in blue. Significance  
701 was determined using a two-tailed Student's t-test. (b) Quantification of CCL5, IL-13, IGFBP6,  
702 VCAM-1, OPG, HGF, Resistin, and P-Selectin expression in primary tumors and residual tumors.  
703 Values were derived from the cytokine arrays shown in (a). Significance was determined using a  
704 two-tailed Student's t-test. (c) CCL5 expression in 18 matched pre- and post-treatment samples  
705 from GSE10281. Red lines show tumors in which CCL5 expression increased following treatment  
706 (>1.5-fold change), and blue lines show tumors with decreased CCL5 expression (<1.5-fold  
707 change). (d) Average CCL5 expression in pre- and post-treatment samples from (e). Significance  
708 was determined using a two-tailed paired Student's t-test.

709 Error bars denote mean  $\pm$  SEM.

710

711 **Figure 3 – figure supplement 1)** (a) Heatmap showing expression of selected cytokine and  
712 chemokine genes from 18 matched human breast tumors prior to treatment, or in residual tumors  
713 following neoadjuvant Letrozole treatment (GSE10281). Gene expression values were log<sub>2</sub>  
714 transformed and median centered. (b-m) Average expression of CCL2, CXCL1, CXCL2, CXCL5,  
715 SELE, HGF, IGFBP6, IL-13, TNFRSF11B, SELP, RETN, and VCAM-1 in 18 matched pre- and  
716 post-treatment samples following neoadjuvant Letrozole treatment (GSE10281). Two-tailed  
717 paired t-test was performed between pre- and post-treatment samples. (n) Average CCL5  
718 expression in 25 matched pre- and post-treatment samples from human breast tumors treated with  
719 neoadjuvant chemotherapy (GSE21974). Two-tailed paired t-test was performed between pre- and  
720 post-treatment samples.

721  
722 **Figure 3 – source data)** Cytokine array expression data analysis from arrays Q1 and Q4.

723  
724 **Figure 4) CCL5 expression promotes tumor recurrence following Her2 downregulation. (a)**  
725 CCL5 protein levels in orthotopic primary (n=4), residual (n=3), and recurrent (n=2) tumors as  
726 determined by ELISA. **(b)** CCL5 protein levels in primary tumor cells engineered to express  
727 CCL5. Results show the mean ± SEM for two independent experiments. Significance was  
728 determined using a two-tailed Student's t-test. **(c)** Recurrence-free survival for mice with control  
729 tumors or tumors expressing CCL5. CCL5 expression significantly accelerated recurrence  
730 (Hazards Ratio (HR) = 2.1, p = 0.02). Results are from a single experiment with 20 control tumors  
731 and 21 CCL5 tumors. P-values and hazards ratios are indicated. Statistical significance was  
732 determined by Mantel-Cox log rank test. **(d)** CCL5 expression as determined by ELISA in primary  
733 tumor cells expressing a control sgRNA or a sgRNA targeting CCL5. Results show the mean ±

734 SEM for a single representative experiment. **(e)** Recurrence-free survival of mice with control  
735 tumors or CCL5 knockout tumors. CCL5 knockout in tumor cells did not significantly delay tumor  
736 recurrence (HR =0.76, p = 0.46). Results are from a single experiment with 26 control tumors  
737 (sgControl) and 24 sgCCL5 tumors. Statistical significance was determined by Mantel-Cox log  
738 rank test.

739

740 Error bars denote mean  $\pm$  SEM.

741

742 **Figure 5) CCL5 promotes macrophage infiltration in residual tumors. (a-d)** Flow cytometry  
743 of immune cells in primary (n=6), regressing (5 days -dox; n=3), residual (n=3), and recurrent  
744 (n=3) tumors from autochthonous MTB;TAN mice. Immune cell populations analyzed include  
745 CD11b+/F4/80+ macrophages (a), CD4+ T cells (b), CD8+ T cells (c), PDGFR $\alpha$  fibroblasts (d),  
746 and tumor cells (e). Each immune cell population was divided into CCR5- or CCR5+ cells, and  
747 the median fluorescence intensity (MFI) of the CCR5+ population was calculated. **(f)** Flow  
748 cytometry of CD45-/PDGFR $\alpha$ + fibroblasts in control residual tumors (n=4) or residual tumors  
749 expressing CCL5 (n=4). **(g)** Flow cytometry of CD11b+/F4/80+ macrophages in control residual  
750 tumors (n=4) or residual tumors expressing CCL5 (n=4).

751

752 Error bars denote mean  $\pm$  SEM. Significance was determined using a two-tailed Student's t-test. \*

753 p < 0.05, \*\* p < 0.01, \*\*\* p < 0.001, \*\*\*\* p < 0.0001

754

755 **Figure 5 - figure supplement 1)** (a) qRT-PCR analysis of Erbb2 in primary, 5 days – dox,  
756 residual, and recurrent tumors from the MTB;TAN model cohort used for flow cytometry analysis

757 of CCR5 expression. (b) qRT-PCR analysis of CCR5 on sorted tumor cells and macrophages from  
758 primary, 5 days -dox, residual, and recurrent tumors from the MTB;TAN model. (c) Flow plots of  
759 CD45-/PDGFR $\alpha$ + fibroblasts in control (n=4) and CCL5-expressing (n=4) residual tumors (d)  
760 Flow plots of CD11b+/F4/80+ macrophages in control (n=4) and CCL5-expressing (n=4) residual  
761 tumors.

762

763 **Figure 5 – figure supplement 2)** Histograms showing CCR5 staining in macrophages, PDGFR $\alpha$   
764 fibroblasts, CD4+ T cells, CD8+ T cells, and tumor cells from primary tumors (n=6), regressing  
765 tumors (5 days -dox; n=3), residual tumors (n=3), and recurrent tumors (n=3).

766

767 **Figure 6) Macrophages express collagen and collagen deposition factors.** (a) RNA-seq  
768 analysis of tumor associated macrophages from primary (n=3), regressing (5 days -dox; n=3), and  
769 recurrent (n=3) tumors. The heatmap shows differentially expressed genes ( $p < 0.01$ , Student's t-  
770 test) between primary and recurrent TAMs. (b) Heatmap showing expression of specific collagen  
771 genes from RNA-seq analysis in (a). (c) qRT-PCR analysis of COL5A1, ASPN, COL24A1, and  
772 PCOLCE expression in the cohort in (a) along with sorted macrophages from residual tumors. ND  
773 = not detected (d) qRT-PCR analysis of COL5A1, ASPN, COL24A1, and PCOLCE expression in  
774 unsorted MTB;TAN primary (n=5) and recurrent (n=5) tumors. (e) Masson's trichrome staining  
775 showing collagen deposition in primary (n=3), residual (n=3), and recurrent (n=3) tumors from the  
776 MTB;TAN model. Collagen is stained in blue, and higher collagen staining is present in residual  
777 and recurrent tumors. (f) Masson's trichrome staining in a subset of control and CCL5-expressing  
778 orthotopic recurrent tumors. The entire cohort of tumors is shown in Figure 6 – figure supplement  
779 1.

780

781 Error bars denote mean  $\pm$  SEM. Significance was determined using a two-tailed Student's t-test. \*

782  $p < 0.05$ , \*\*\*  $p < 0.001$ .

783

784 **Figure 6 – figure supplement 1)** (a) Average expression of ASPN, COL5A1, COL24A1, and  
785 PCOLCE in 18 matched pre- and post-treatment samples from human breast tumors treated with  
786 neoadjuvant Letrozole (GSE10281). Two-tailed paired t-test was performed between pre- and  
787 post-treatment samples. (b) Masson's trichrome staining showing collagen deposition in control  
788 (n=4) and CCL5-expressing (n=4) recurrent tumors. (c) Quantification of (b).

789

790 **Figure 6 – source data 1)** Differentially expressed genes from RNA-seq from primary and  
791 recurrent tumor cell lines used to clear contaminants from TAM RNA-seq

792 **Figure 6 – source data 2)** Candidate list of differentially expressed genes between primary and  
793 recurrent TAMs after filtering

794

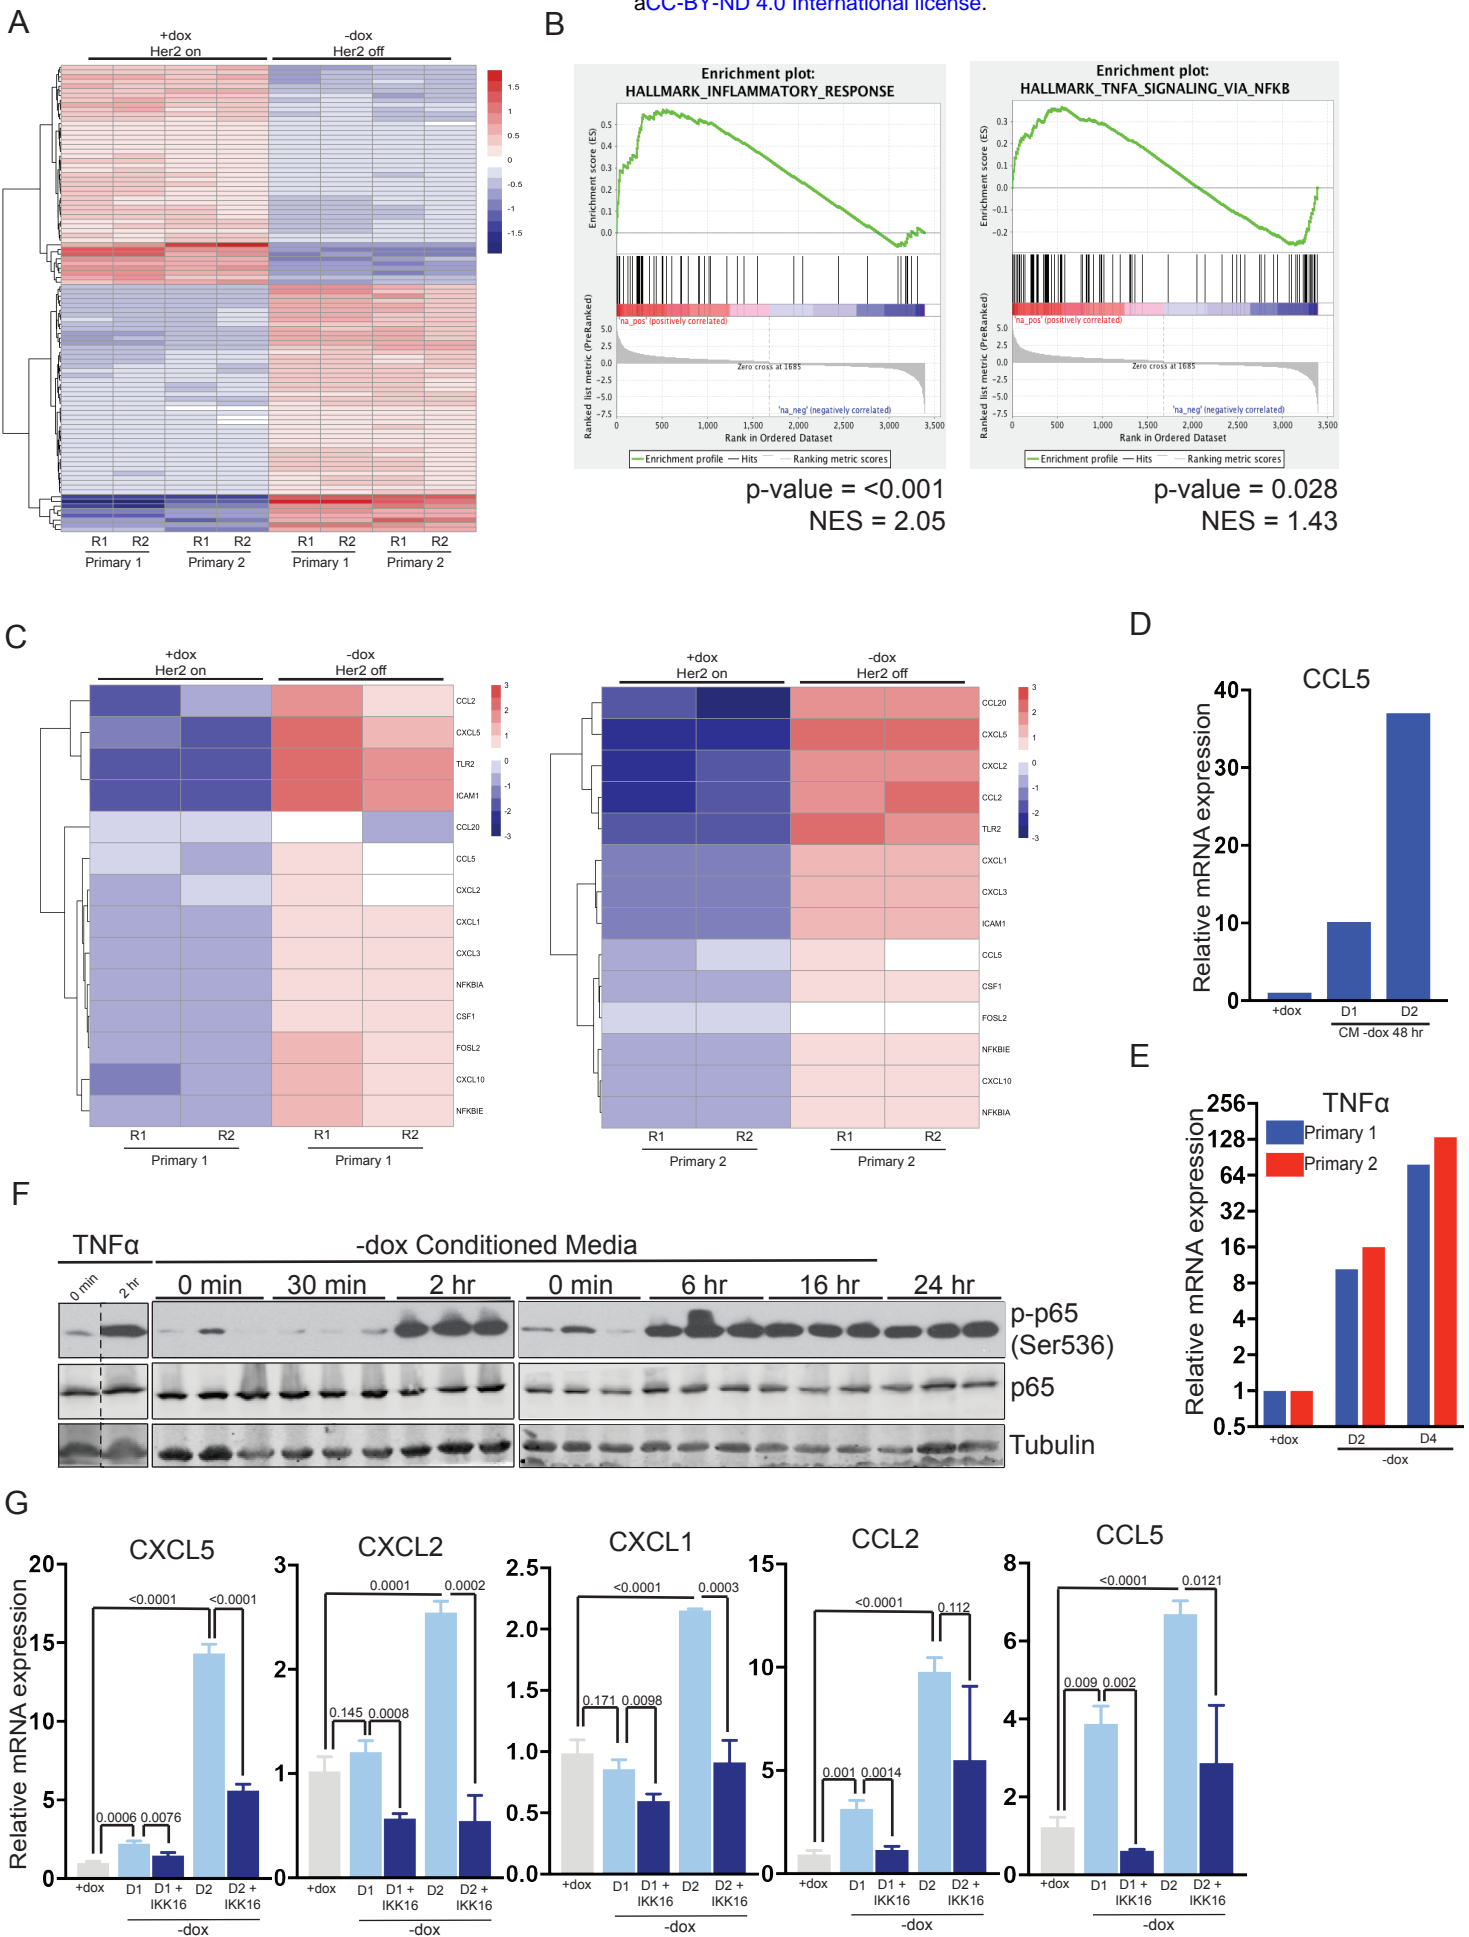



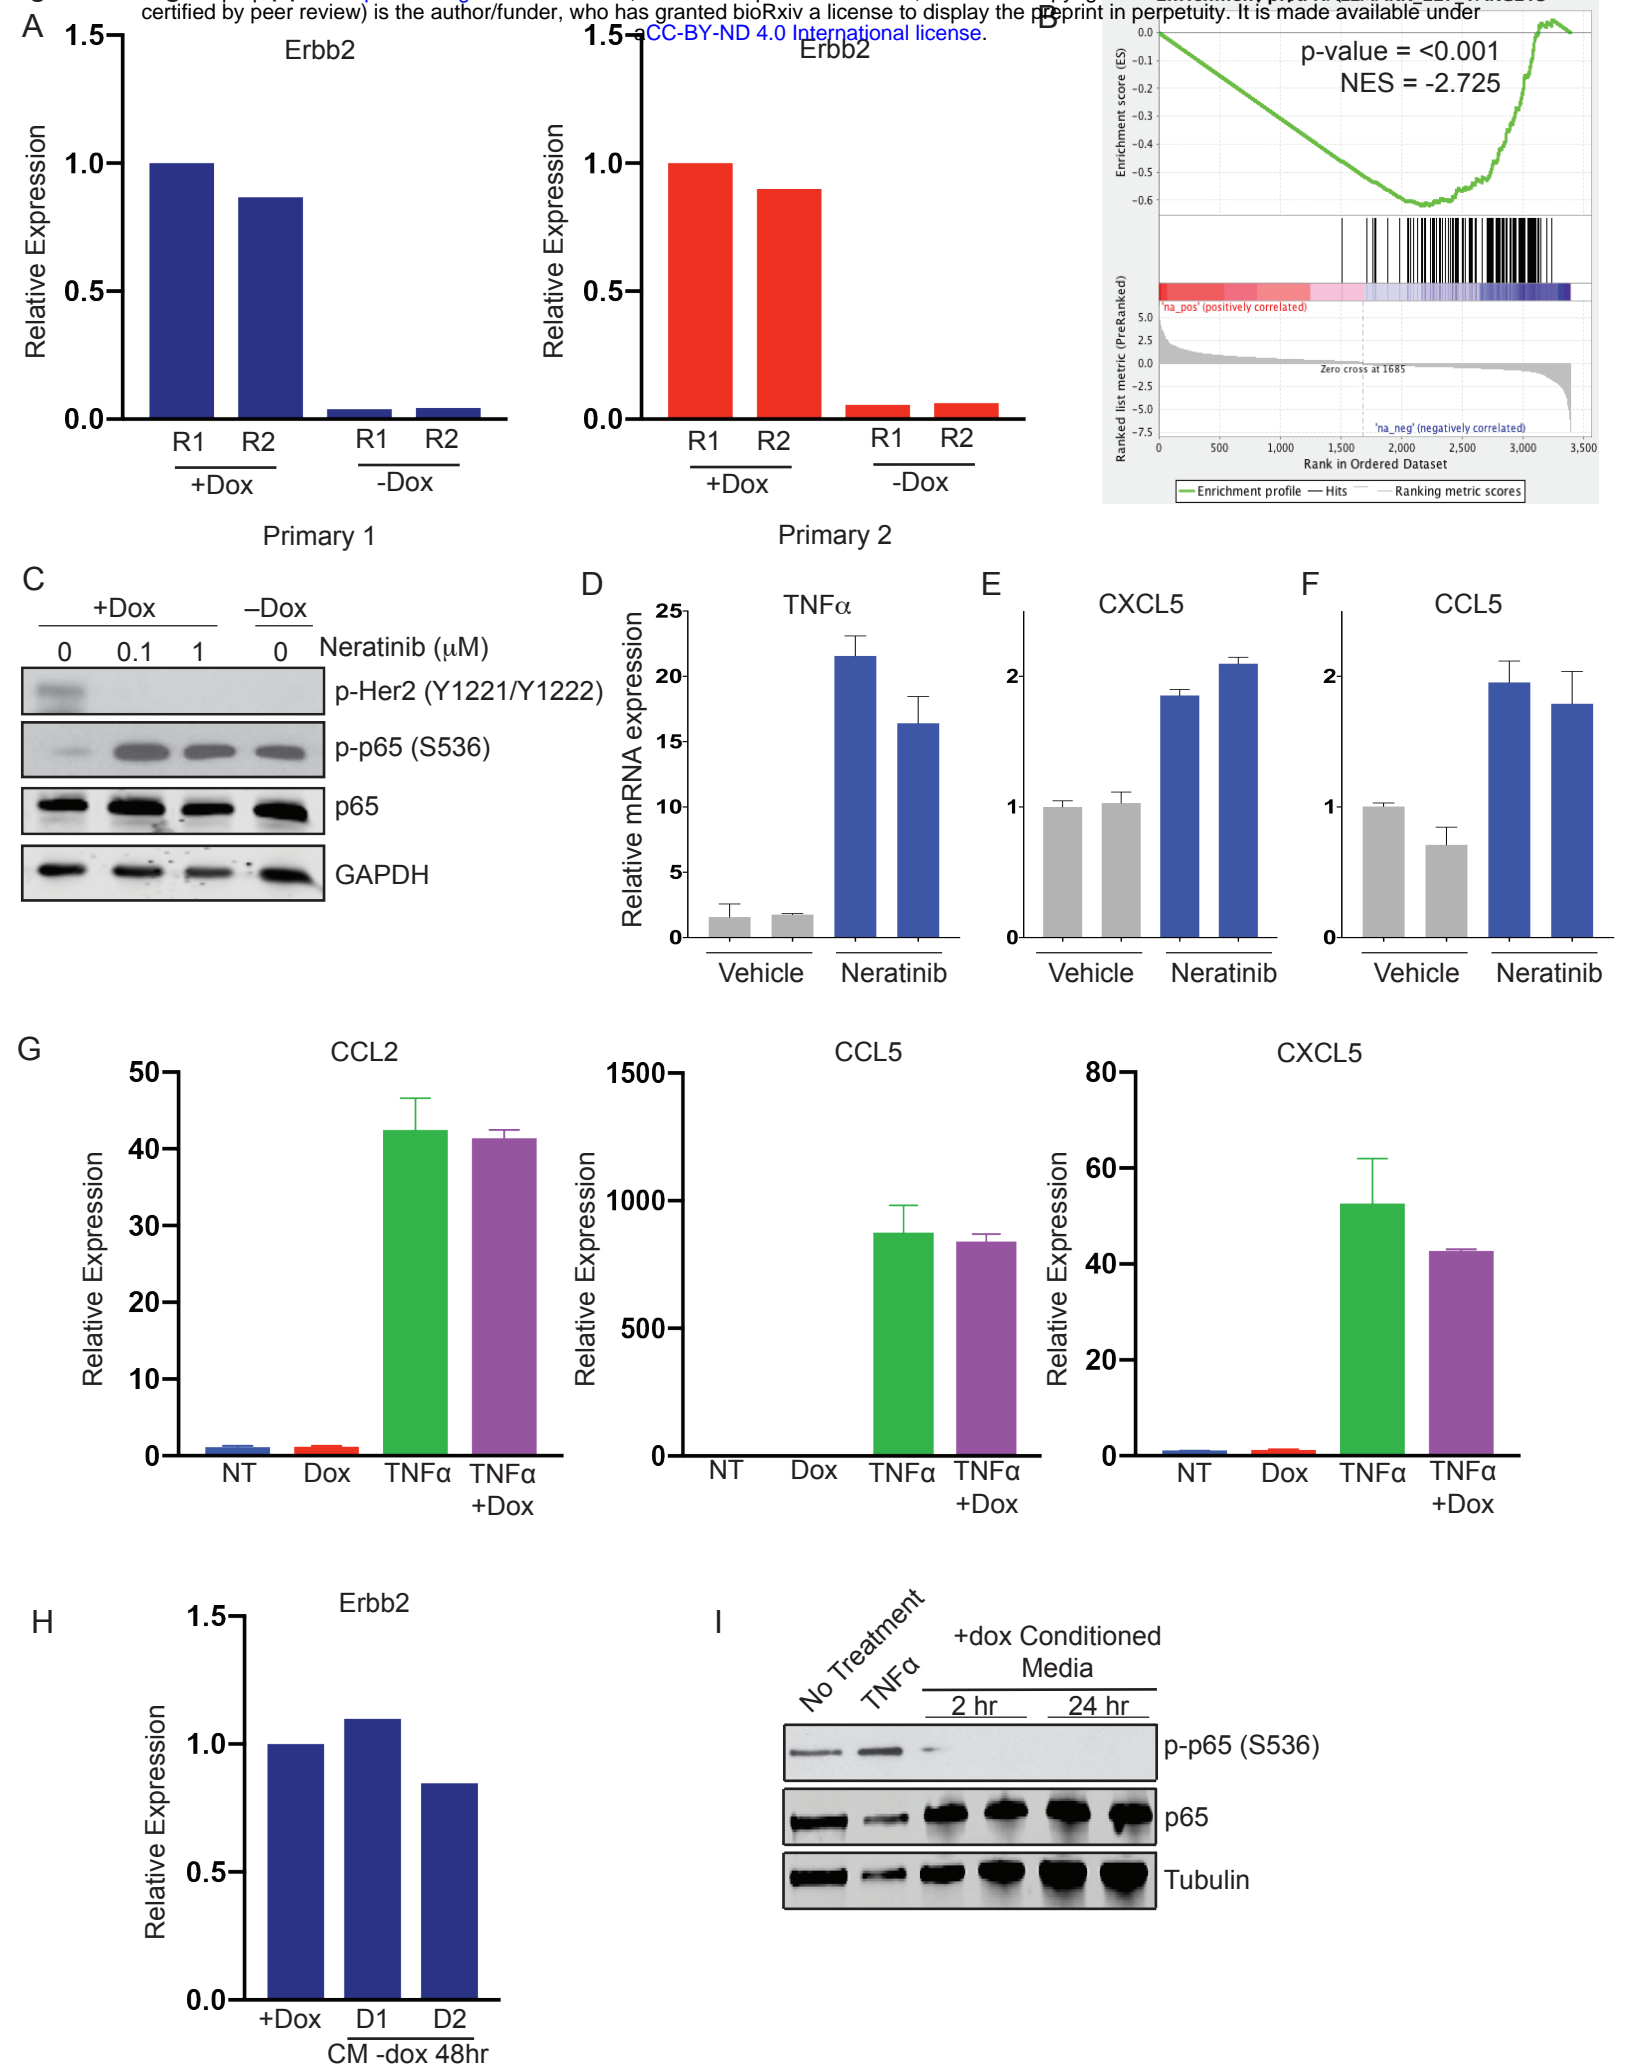



A

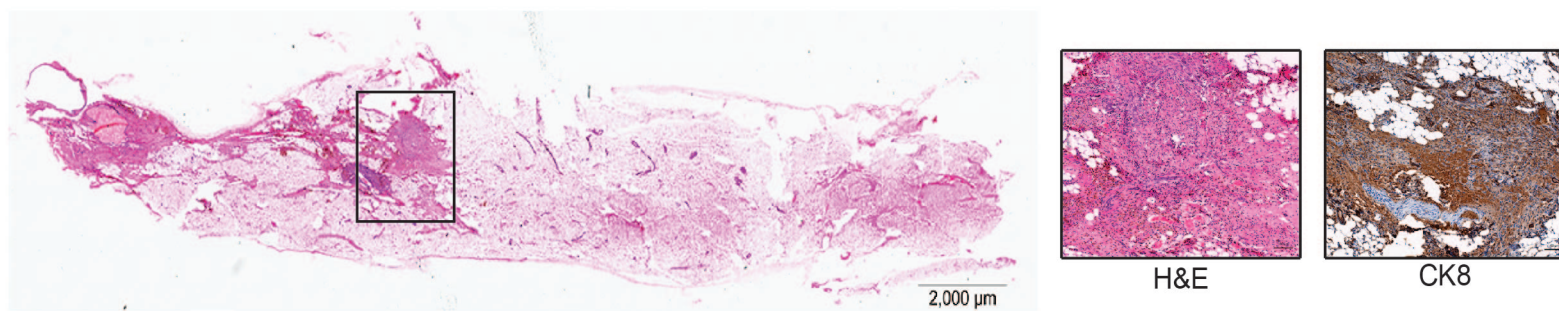

B

Primary Tumor

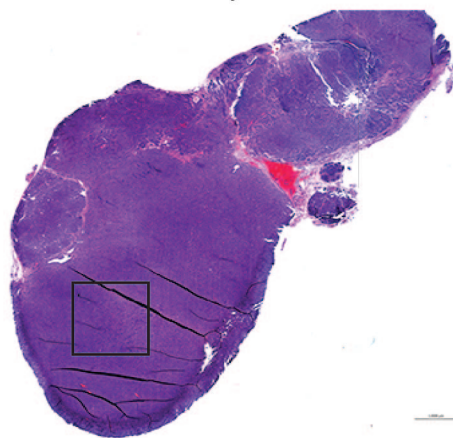

C

5 day -Dox

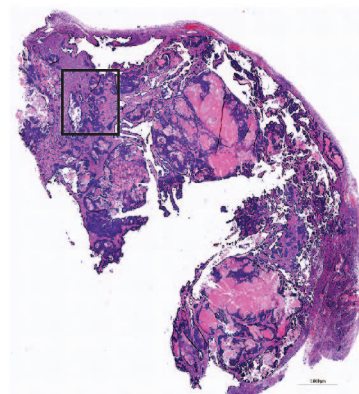

D

Residual Tumor

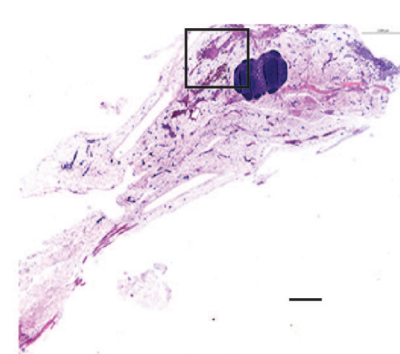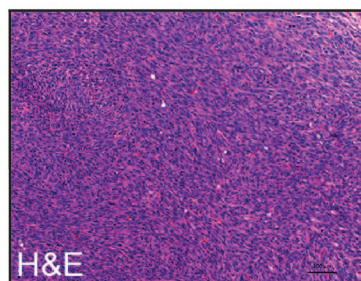

H&E

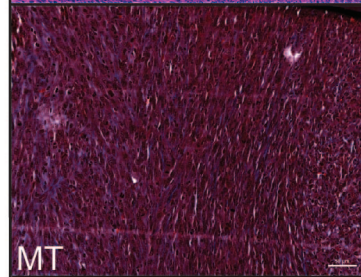

MT

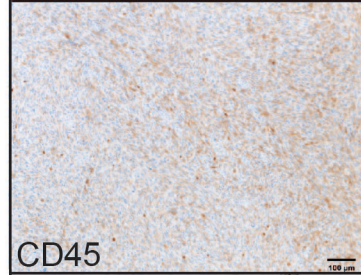

CD45

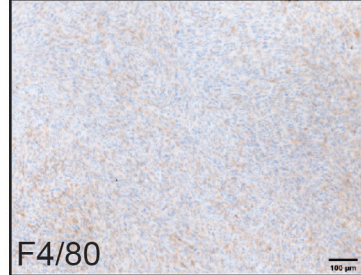

F4/80

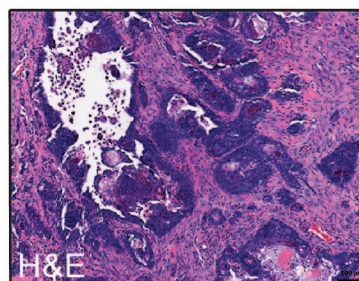

H&E

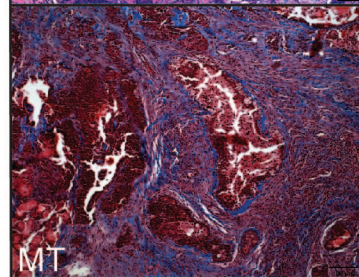

MT

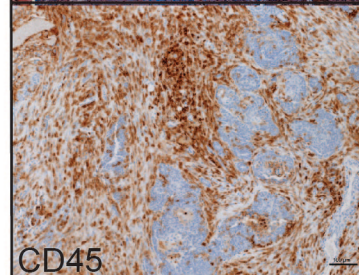

CD45

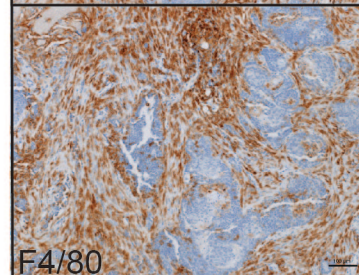

F4/80

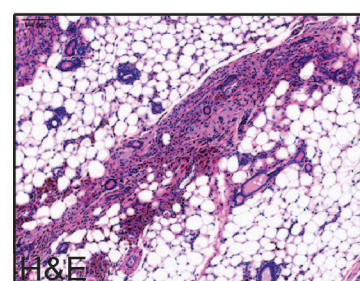

H&E

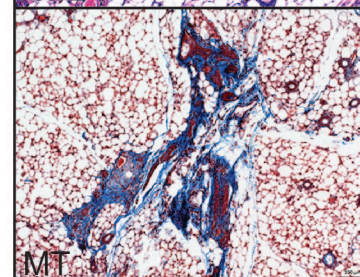

MT

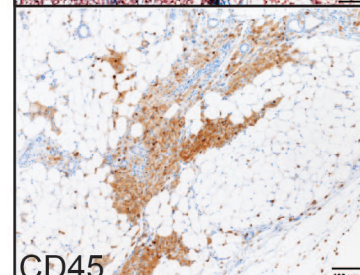

CD45

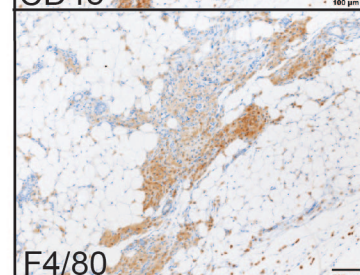

F4/80



A

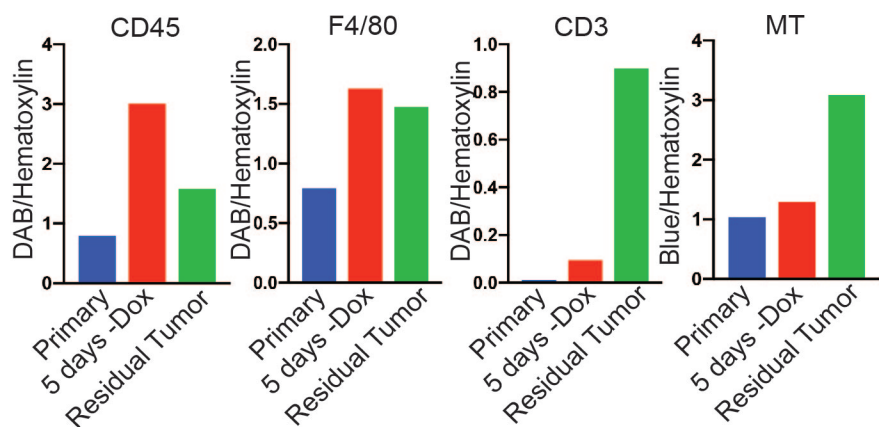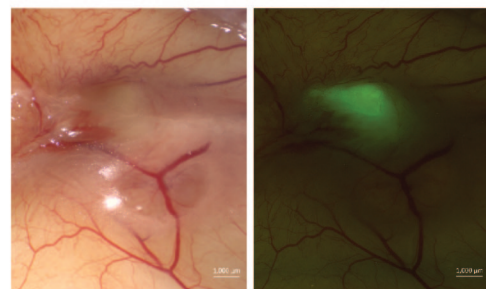

B

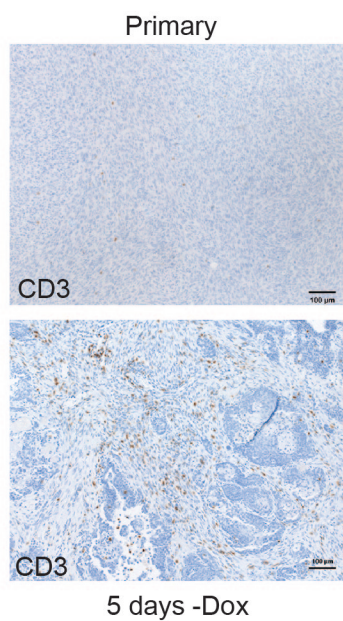

D

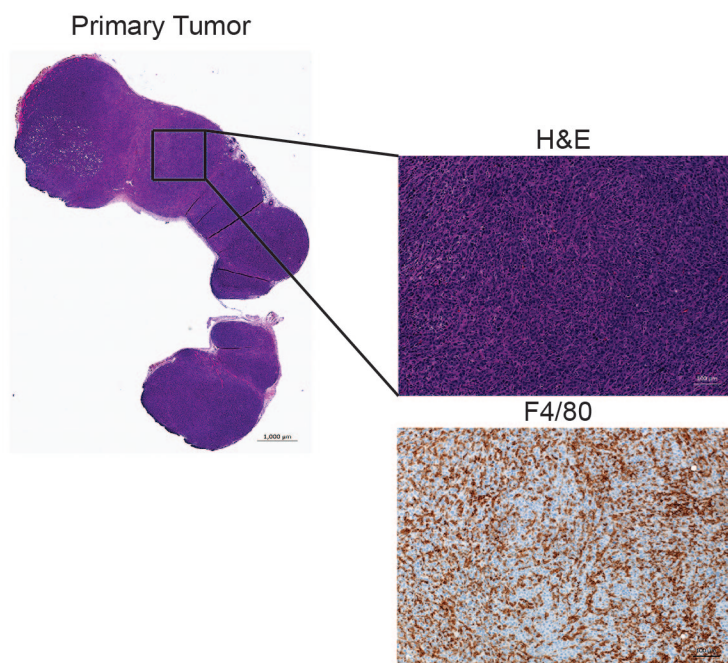

E

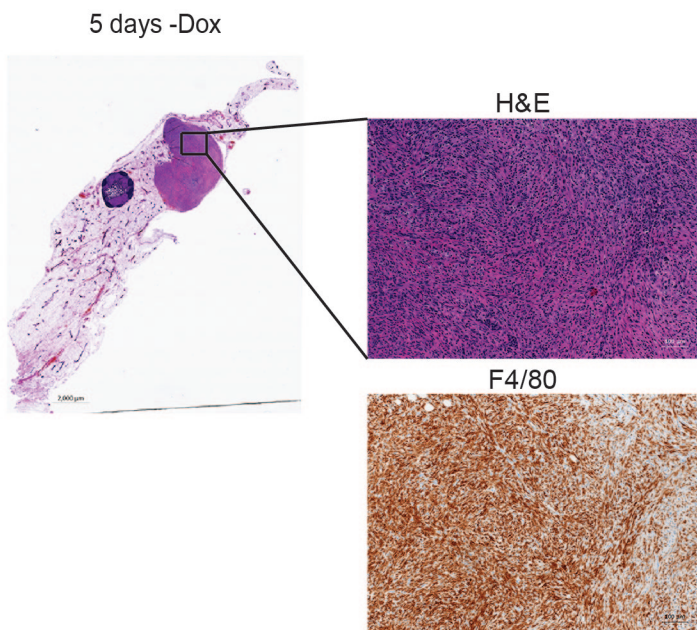

F

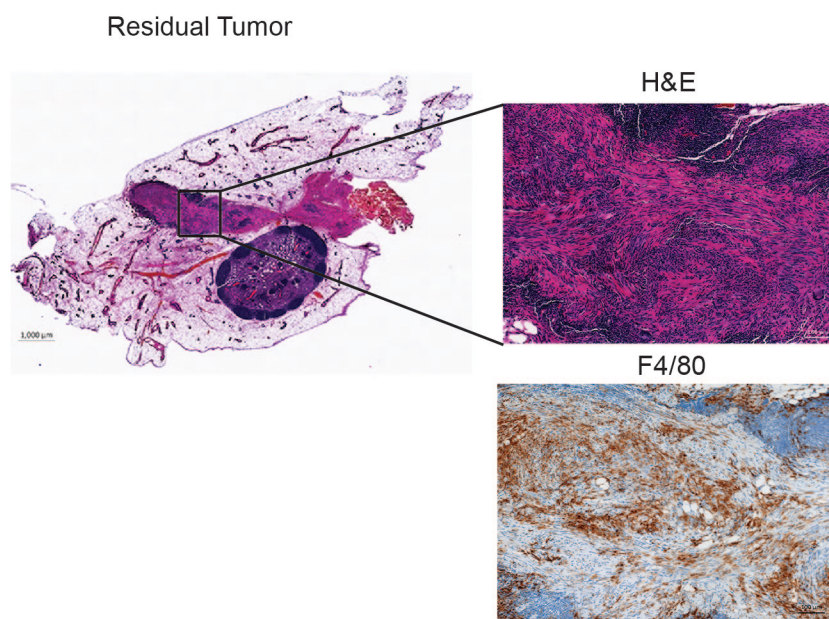

A

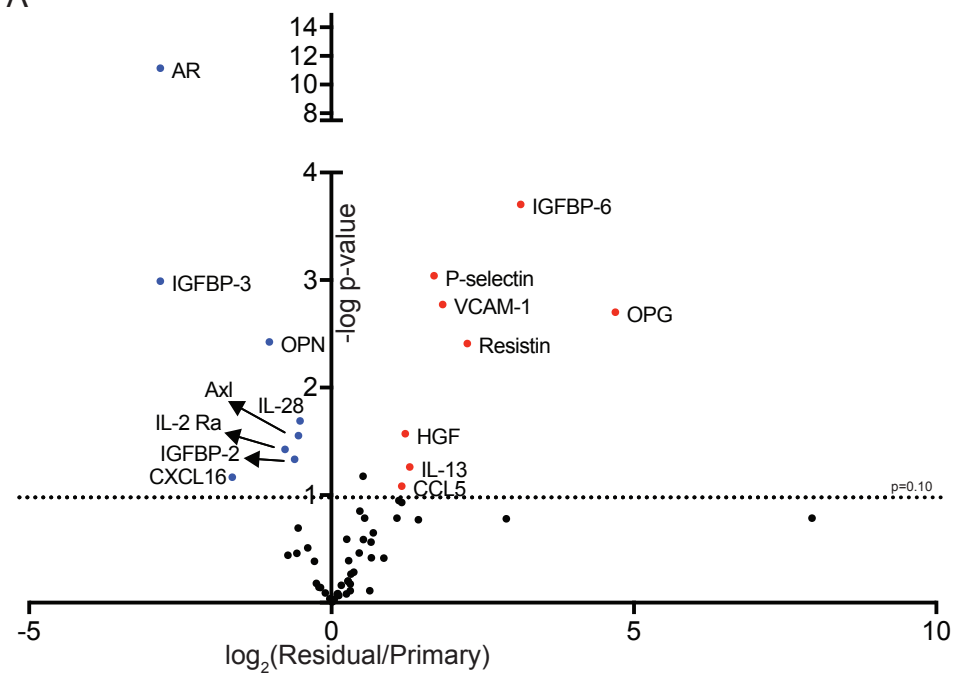

B

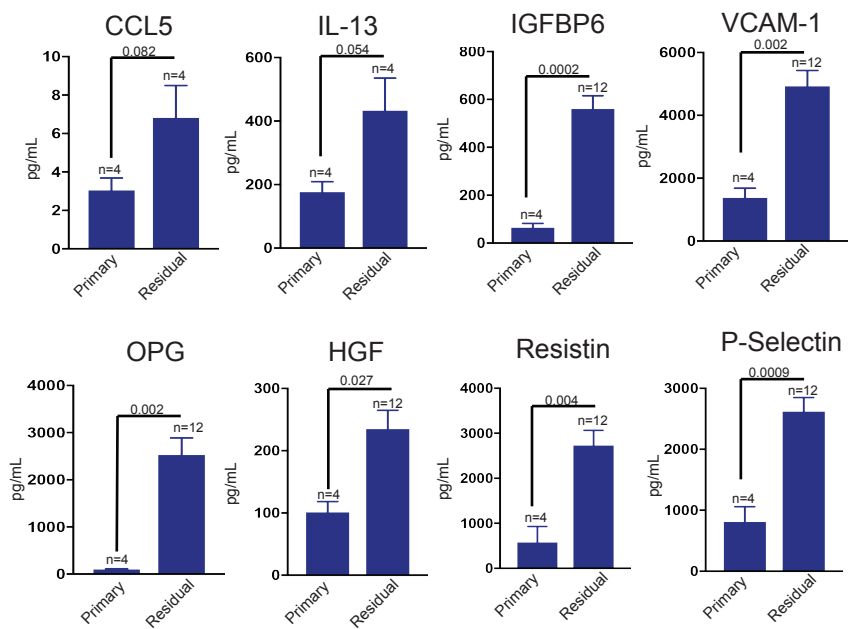

C

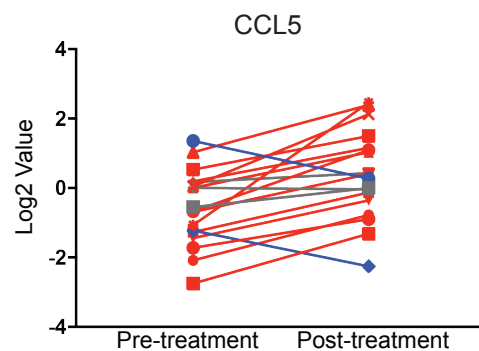

D

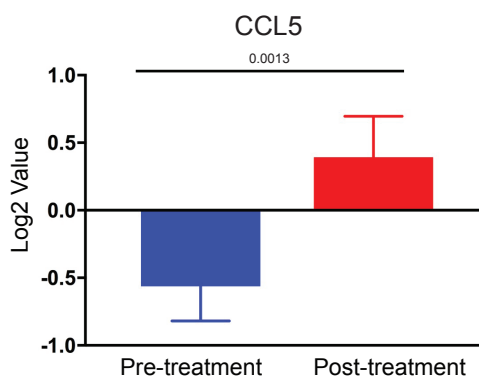

A

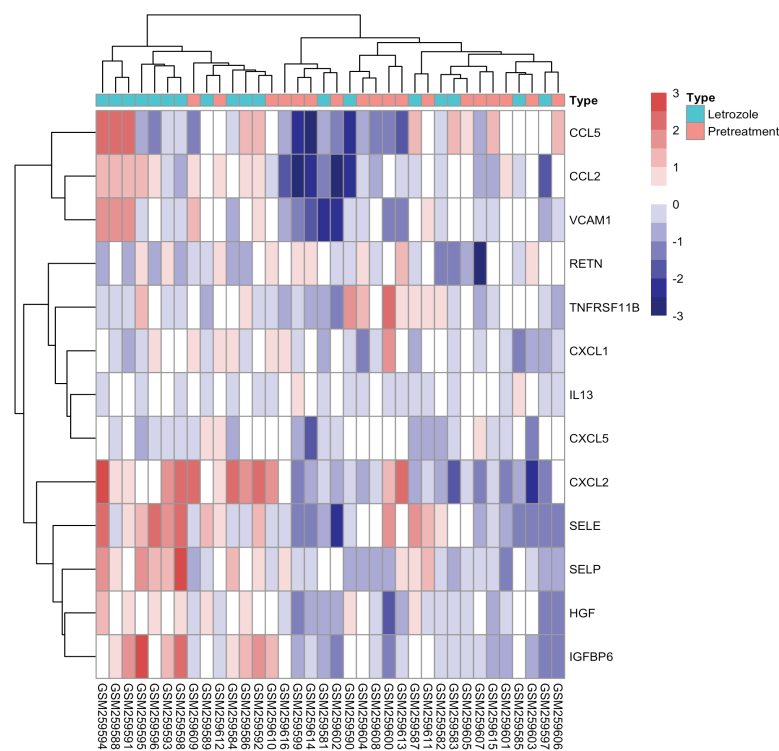

B

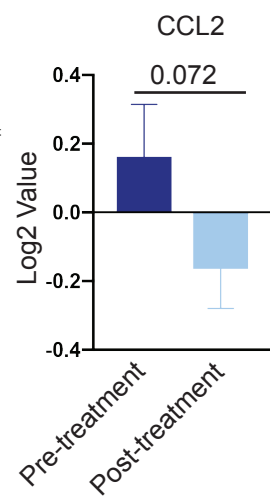

C

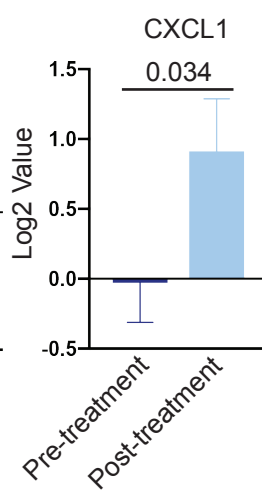

D

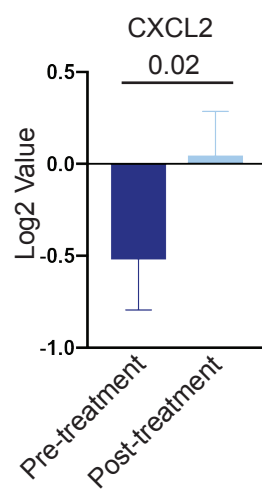

E

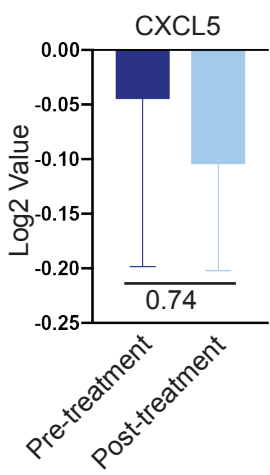

F

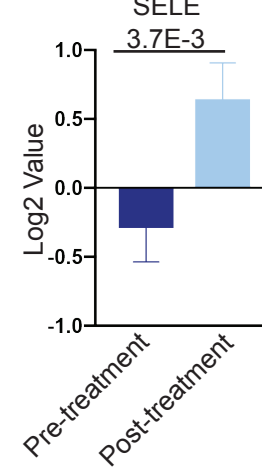

G

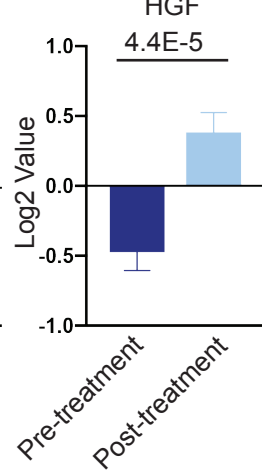

H

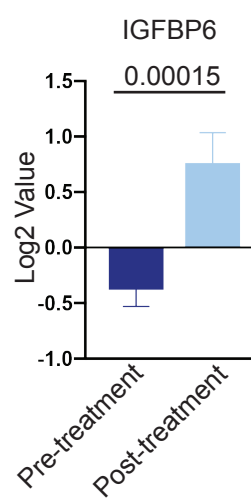

I

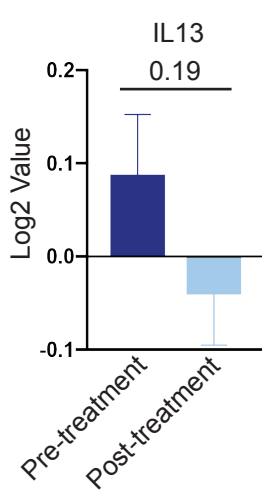

J

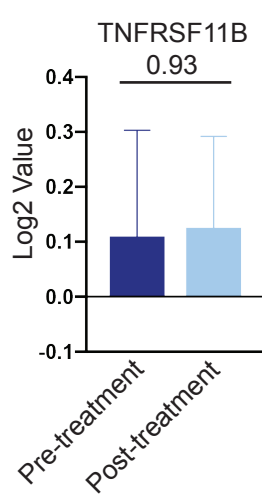

N

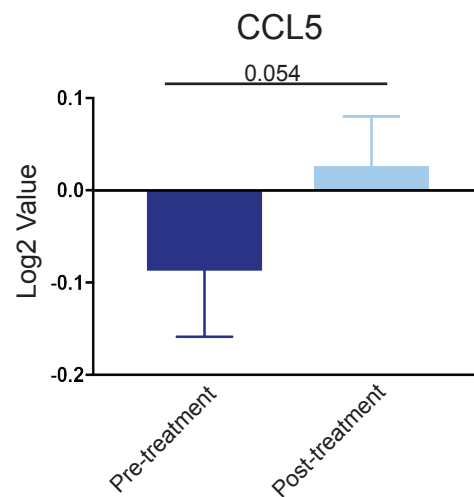

K

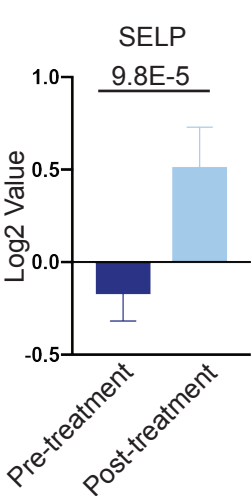

L

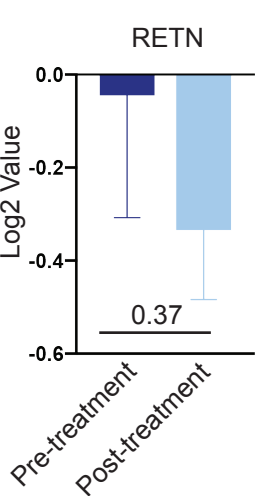

M

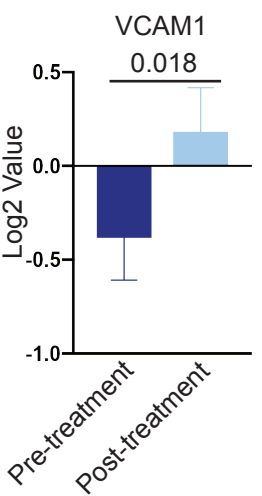

A

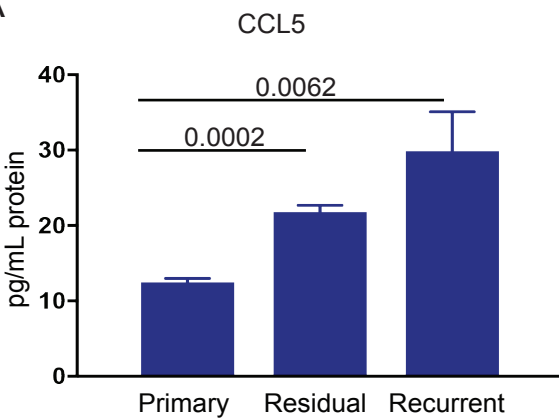

B

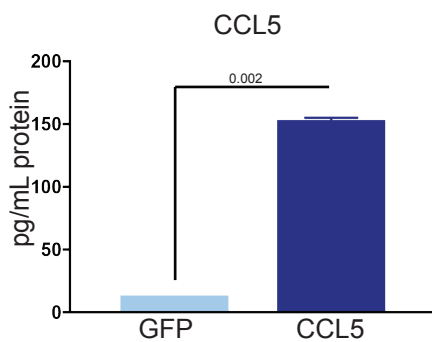

C

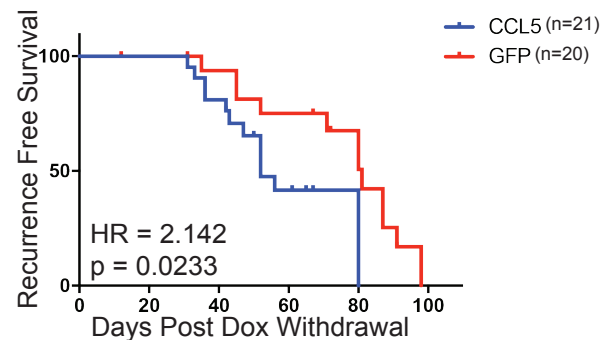

D

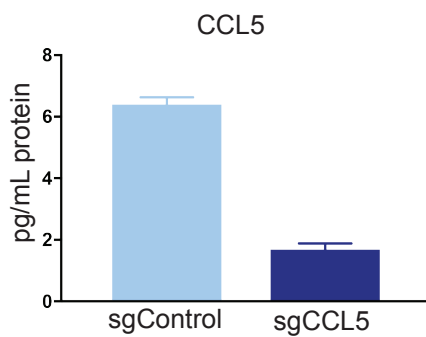

E

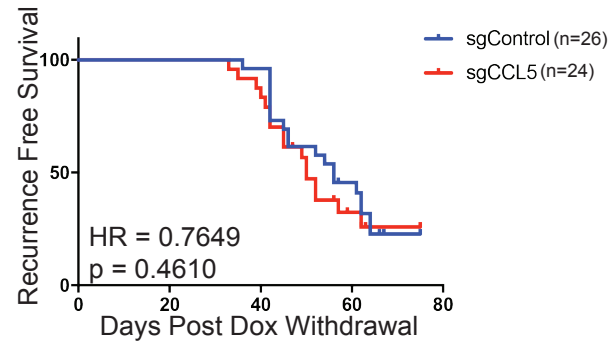

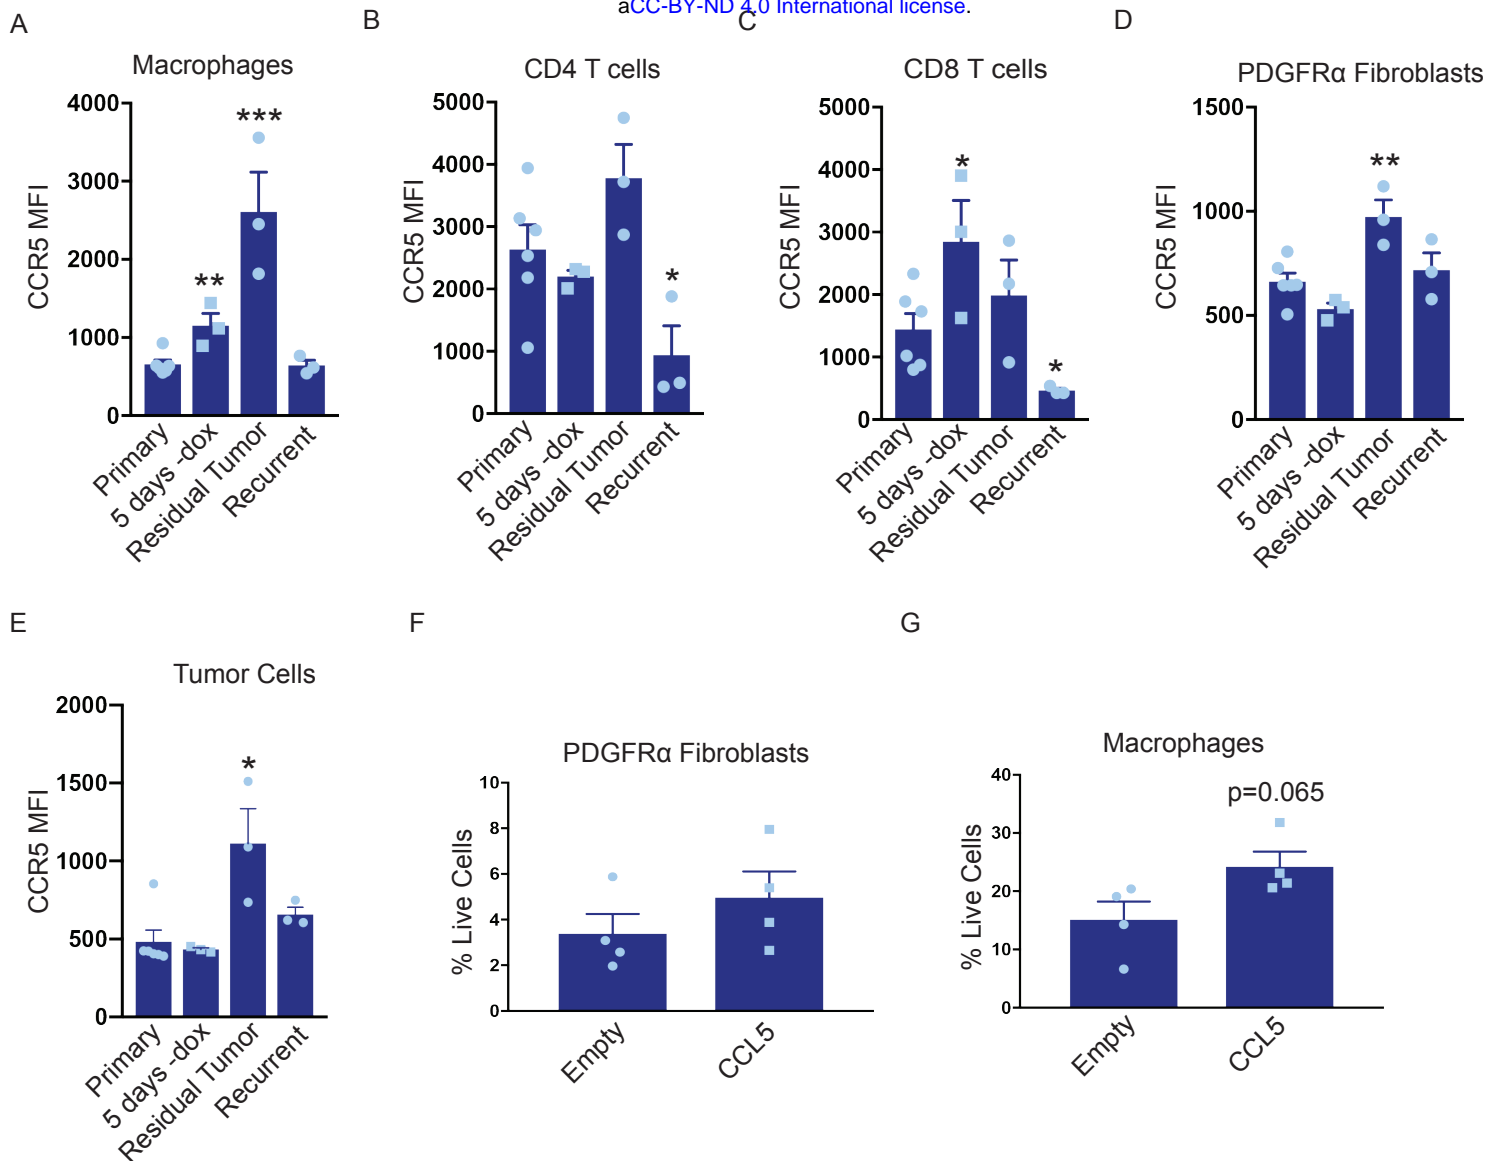



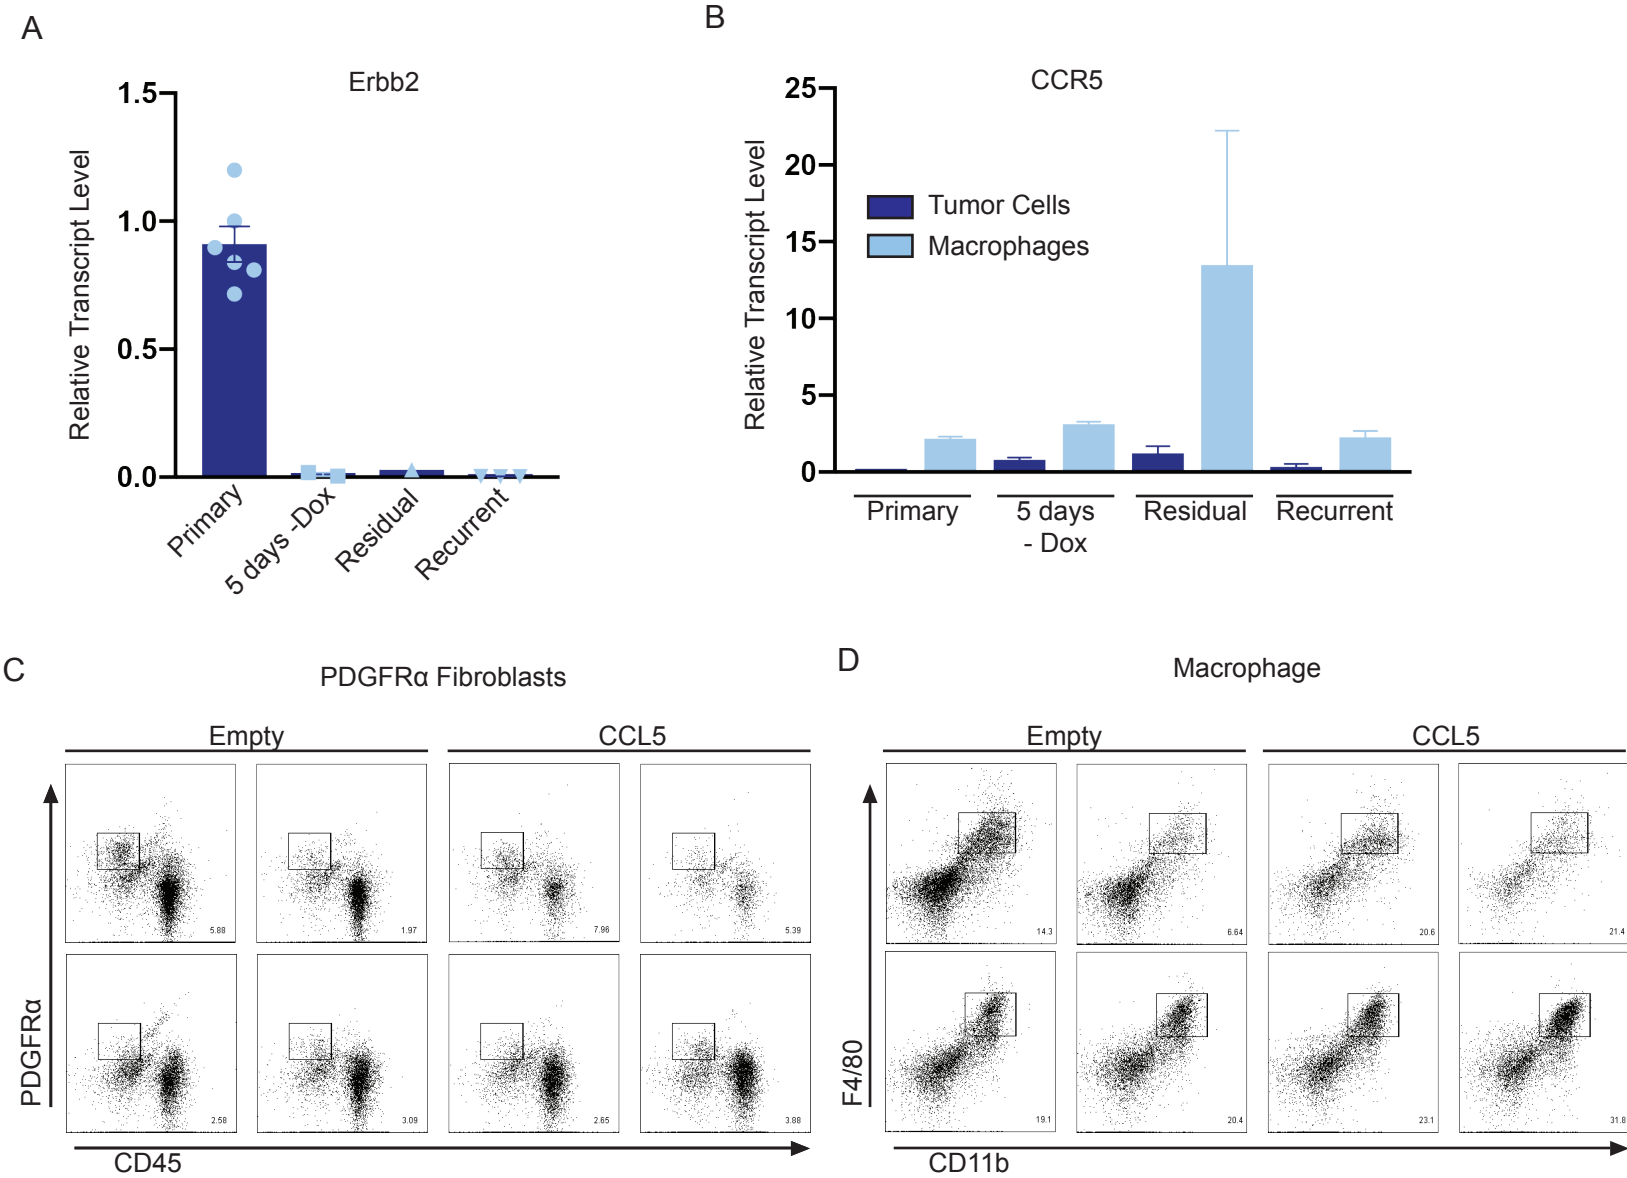



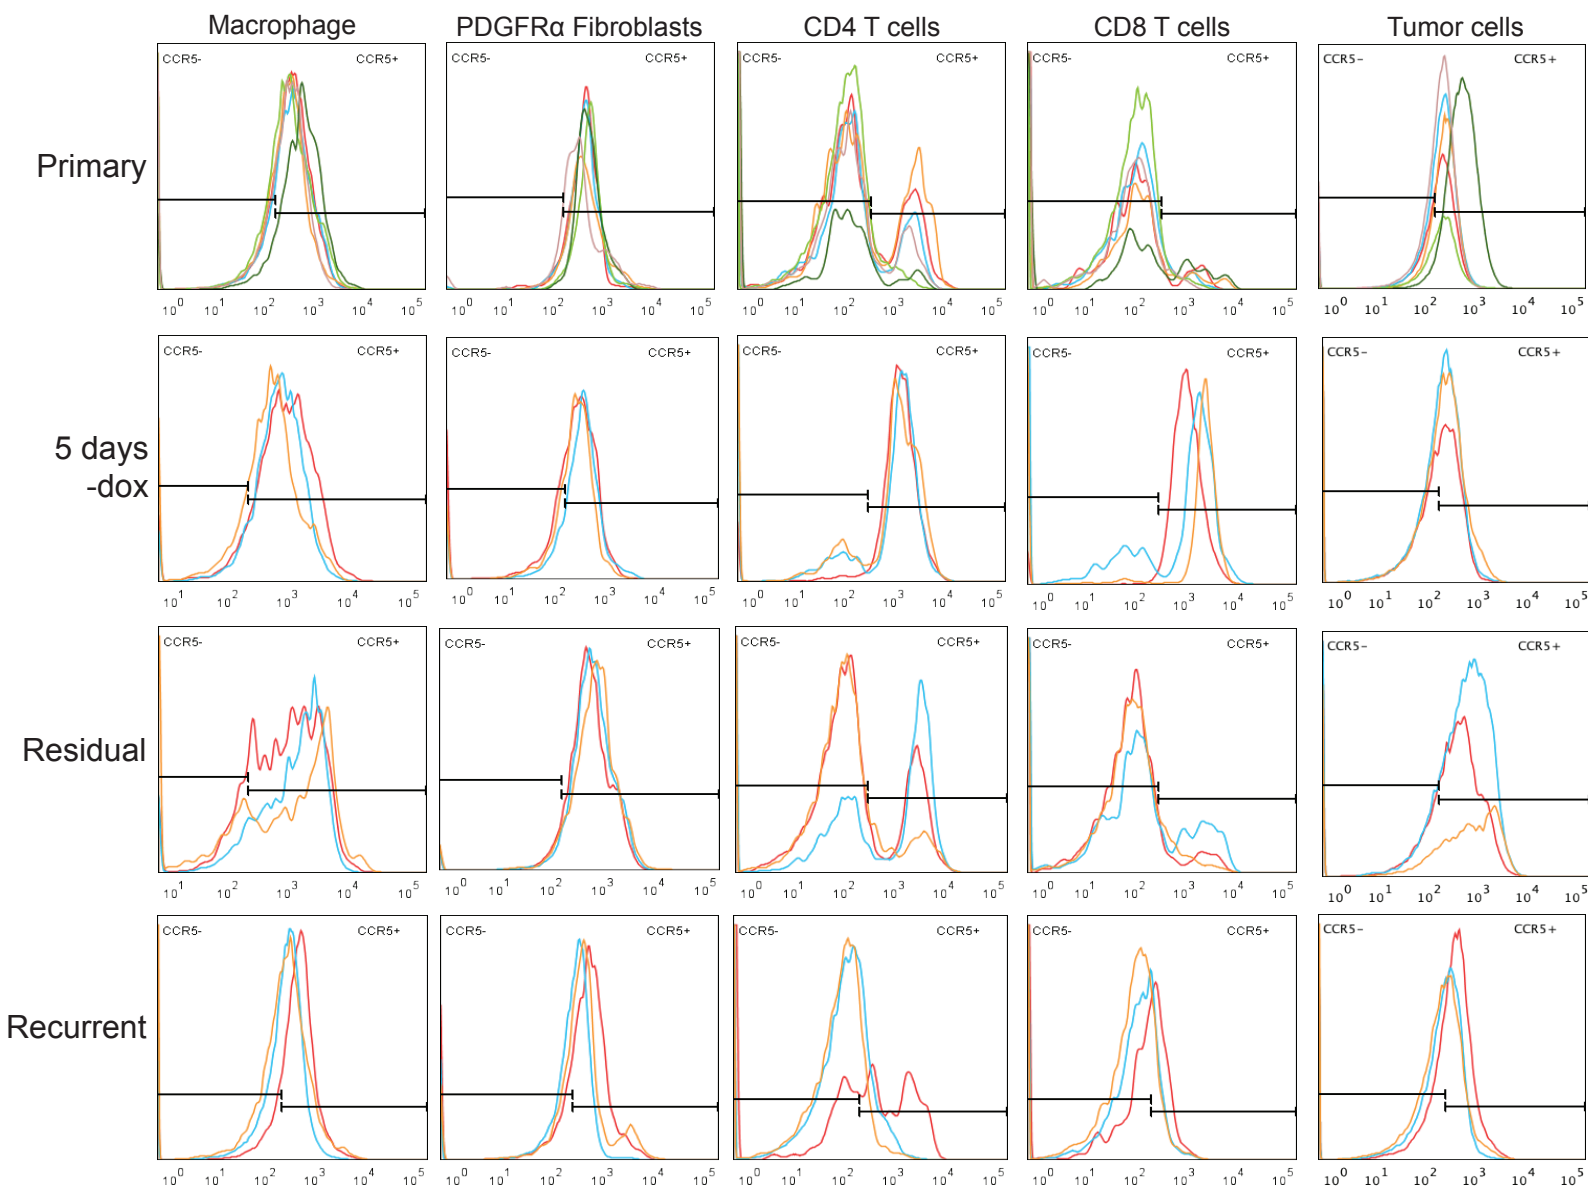

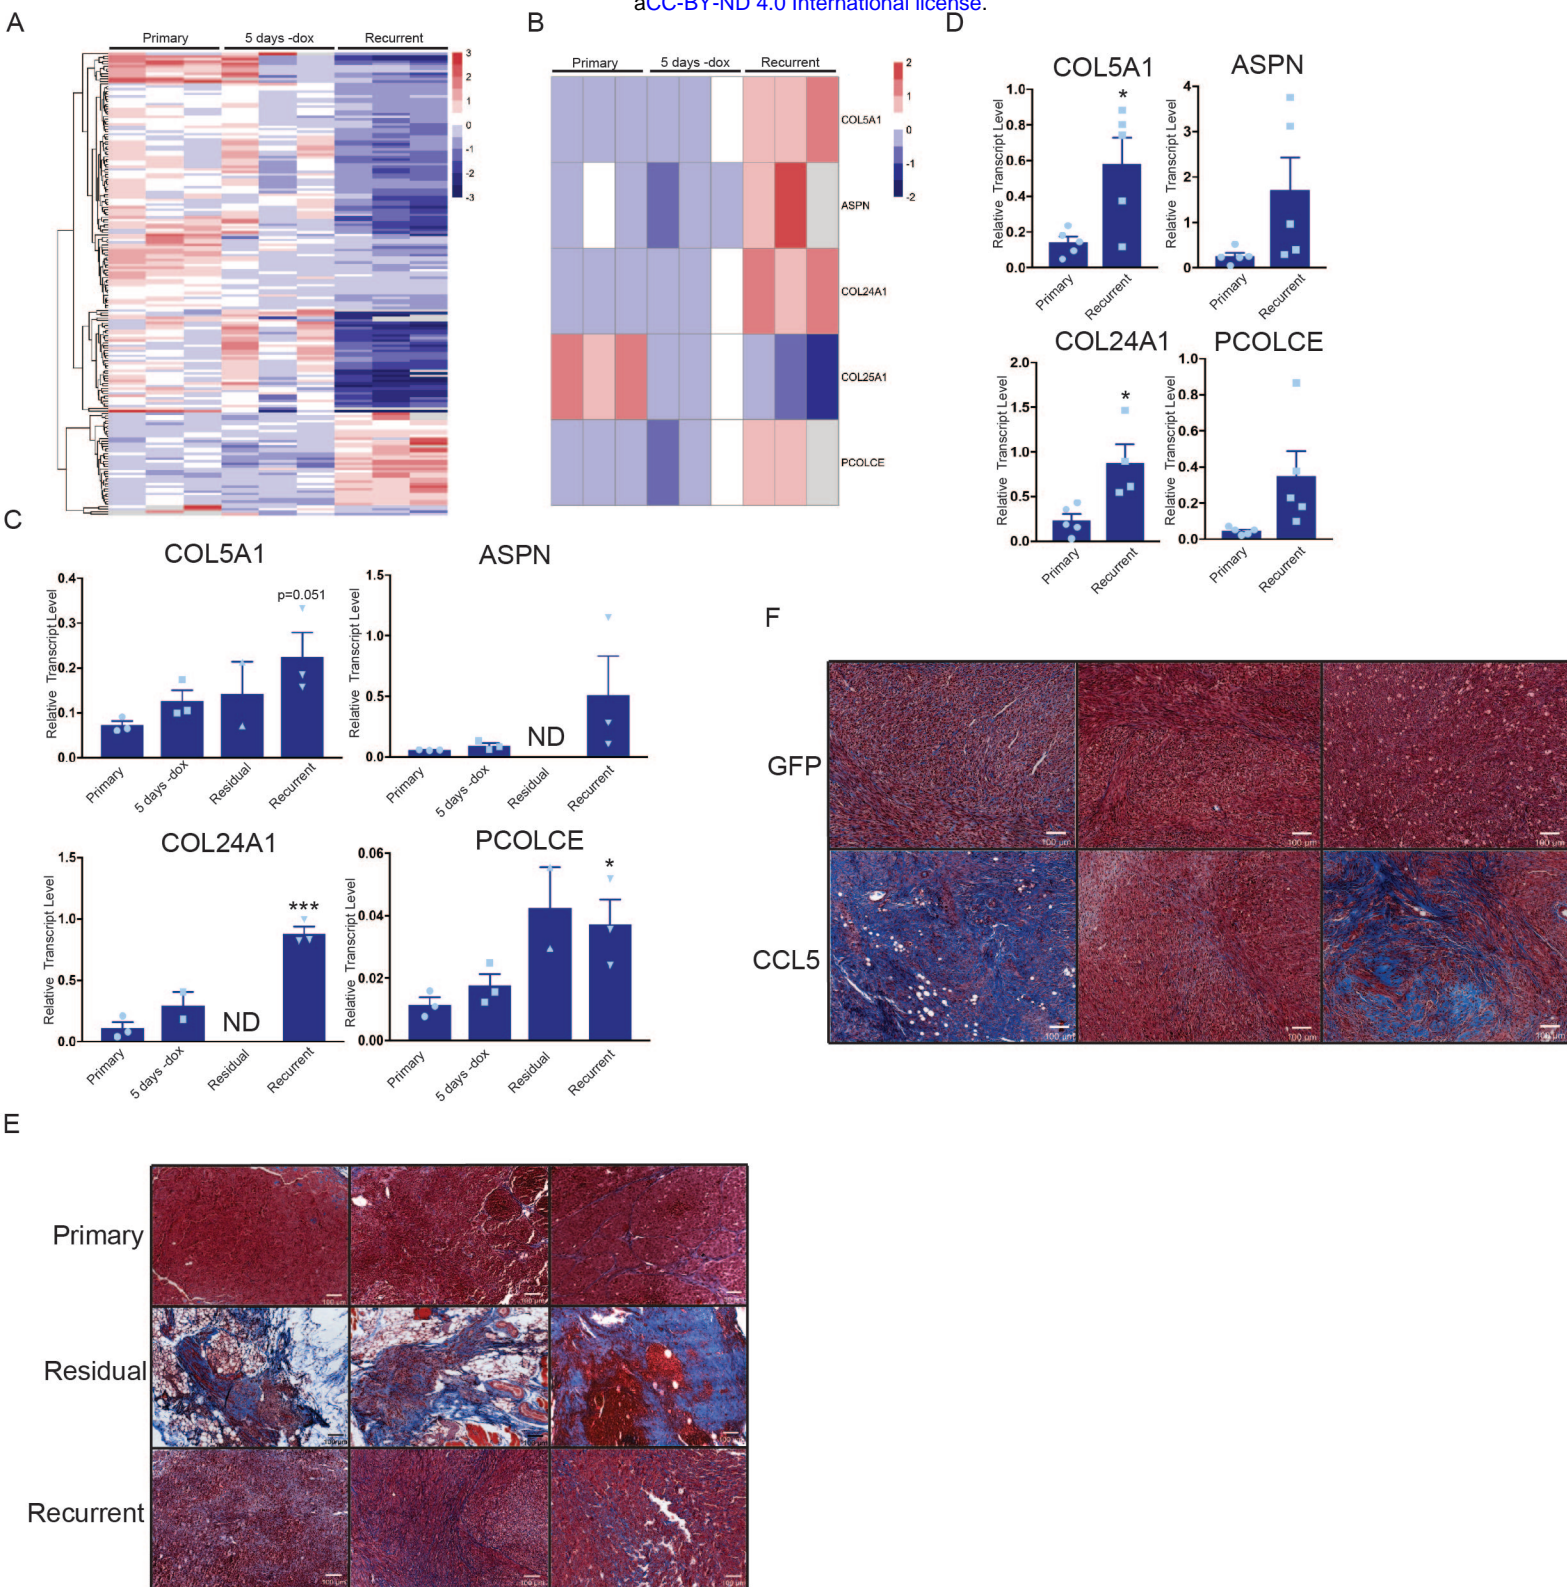



A

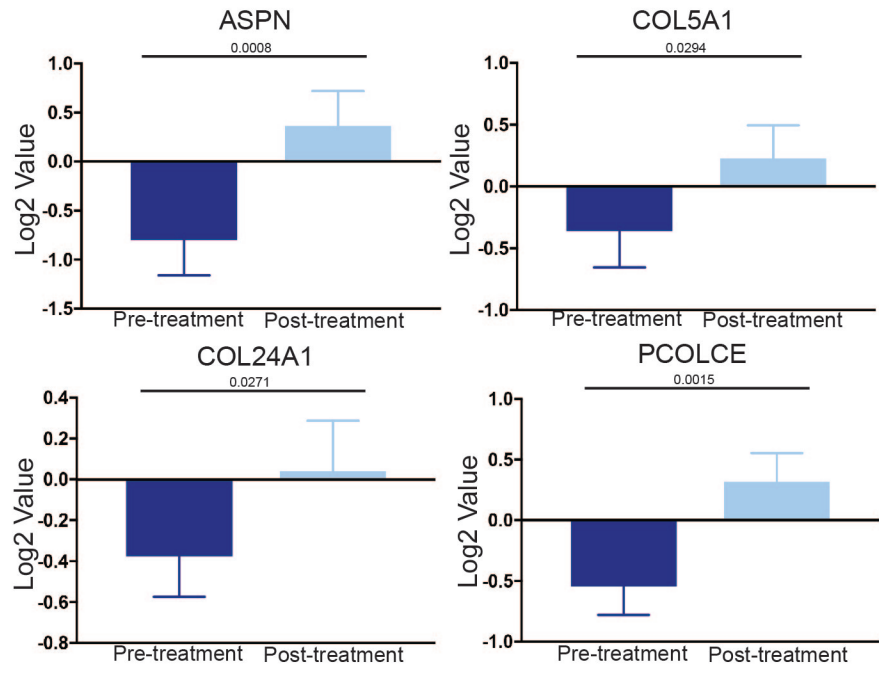

B

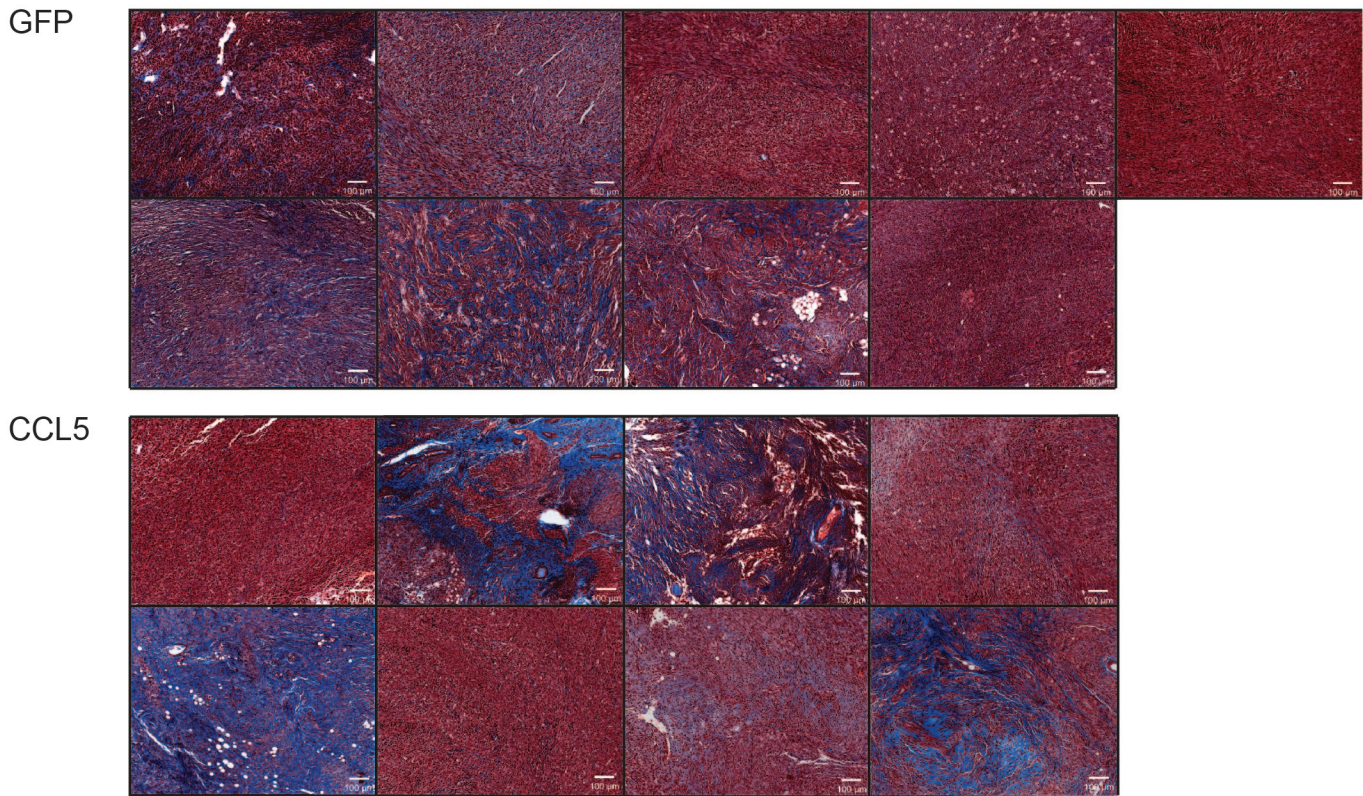

C

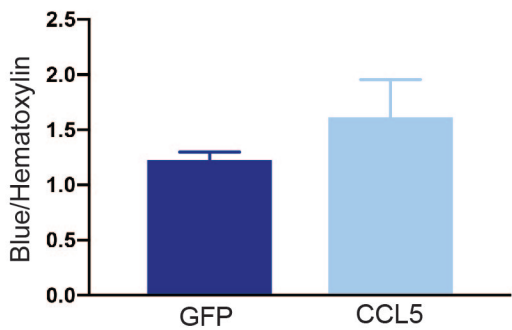

Source: http://biorxiv.org/content/10.1101/584979v1.full.pdf
